# Supplementary material for: DFT characterization on the mechanism of water splitting catalyzed by single-Ru-substituted polyoxometalates
Source: Royal Society of Chemistry journal article supplement (doi:10.1039/c3dt50666e), 2013-01-01
Supplement: c3dt50666e.pdf [file c3dt50666e.pdf]

Electronic Supplementary Information

**DFT Characterization on the Mechanism of Water Splitting Catalyzed by Single-Ru-substituted  
Polyoxometalates**

Zhong-Ling Lang, Guo-Chun Yang, Na-Na Ma, Shi-Zheng Wen, Li-Kai Yan, Wei Guan\* and  
Zhong-Min Su\*

Institute of Functional Material Chemistry, Faculty of Chemistry, Northeast Normal University,  
Changchun 130024, People's Republic of China

The material enclosed in the electronic supplementary information is organized as following:

1. Important HOMOs and LUMOs for  $[\text{Ru}^{\text{III}}(\text{H}_2\text{O})\text{SiW}_{11}\text{O}_{39}]^{5-}$  (**1**) complex computed at the B3LYP level in gas phase. (Fig. S1, page S2)
2. Important HOMOs and LUMOs for  $[\text{Ru}^{\text{IV}}(\text{H}_2\text{O})\text{SiW}_{11}\text{O}_{39}]^{4-}$  (**2**) complex computed at the B3LYP level in gas phase. (Fig. S2, page S2)
3. The two highest singly occupied  $\pi^*$  molecular orbitals and the spin density distribution of  $[\text{Ru}^{\text{IV}}(\text{OO})\text{-POM}]^{6-}$ . (Fig. S3, page S3)
4. Calculated Mulliken atomic charges (e) of the Ru, O<sub>a</sub>, O<sub>w</sub> atoms in pathways **a**, **b**, and **c**. (Table S1, page S3)
5. Calculated energy profile for the O–O bond formation by pathway **a**, **b**, and **c**. The relative energies with solvation correction at M06(SMD)[6-311+g\*\*/LANL2DZ(W, Ru)] level are given in kcal/mol. (Fig. S4, page S4)
6. The calculated relative energy of some important intermediates in different spin states at B3LYP(SMD)[6-311+g\*\*/LANL2DZ(W, Ru)] level. (Table S2, page S5)
7. The Cartesian coordinates (xyz) for all optimized structures are presented. (page S5-S44)
8. The complete reference 37. (page S44)

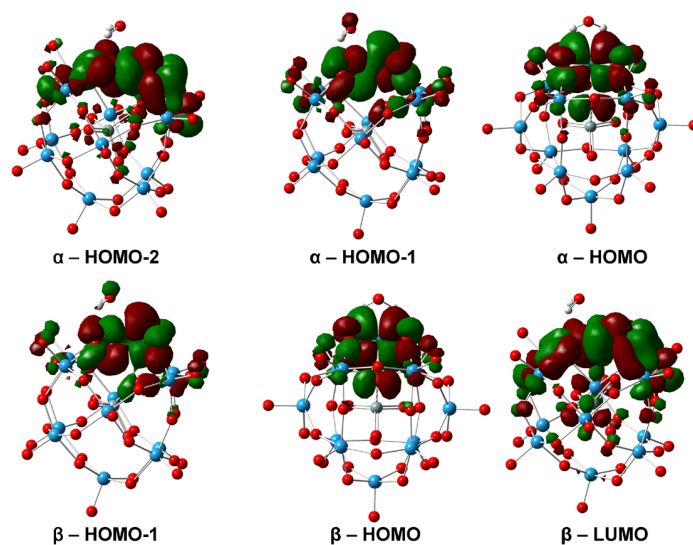

**Fig. S1** Important HOMOs and LUMOs for  $[\text{Ru}^{\text{III}}(\text{H}_2\text{O})\text{SiW}_{11}\text{O}_{39}]^{5-}$  (1) complex computed at the B3LYP level in gas phase.

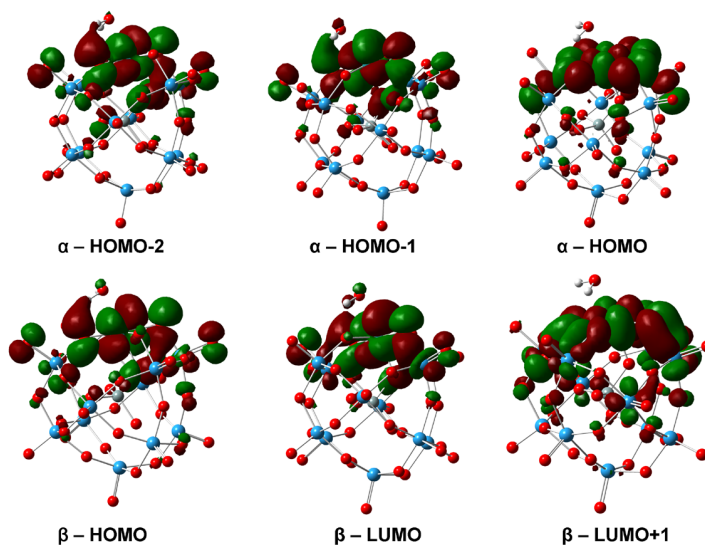

**Fig. S2** Important HOMOs and LUMOs for  $[\text{Ru}^{\text{IV}}(\text{H}_2\text{O})\text{SiW}_{11}\text{O}_{39}]^{4+}$  (2) complex computed at the B3LYP level in gas phase.

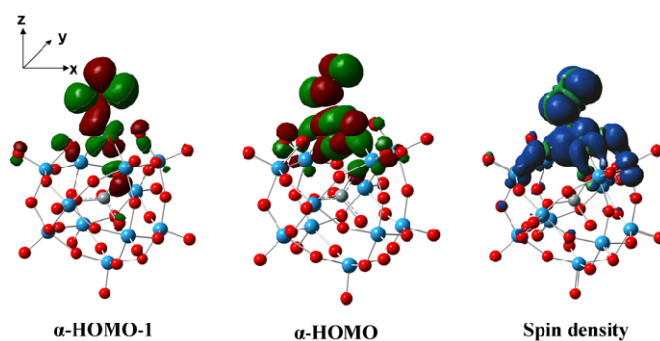

**Fig. S3** The two highest singly occupied  $\pi^*$  molecular orbitals and the spin density distribution of  $[\text{Ru}^{\text{IV}}(\text{OO})\text{SiW}_{11}\text{O}_{39}]^{6-}$  (**5**).

**Table S1** Calculated Mulliken atomic charges (e) of the Ru,  $\text{O}_a$ ,  $\text{O}_w$  atoms in pathways **a**, **b**, and **c**

| charge           | atom            | $\mathbf{3}_{a/b/c}$ | $\mathbf{TS1}_{a/b/c}$ | $\mathbf{4H}_{a/b/c}$ |
|------------------|-----------------|----------------------|------------------------|-----------------------|
| pathway <b>a</b> | Ru              | 1.26                 | 1.00                   | 0.88                  |
|                  | $\text{O}_a$    | -0.48                | -0.43                  | -0.38                 |
|                  | $\text{O}_w$    | -0.68                | -0.50                  | -0.40                 |
| pathway <b>b</b> | Ru              | 1.26                 | 1.13                   | 0.83                  |
|                  | $\text{O}_a$    | -0.55                | -0.49                  | -0.33                 |
|                  | $\text{O}_w$    | -0.71                | -0.63                  | -0.39                 |
| pathway <b>c</b> | Ru              | 1.28                 | 0.95                   | 0.88                  |
|                  | $\text{O}_a$    | -0.48                | -0.41                  | -0.40                 |
|                  | $\text{O}_{w1}$ | -0.70                | -0.46                  | -0.38                 |

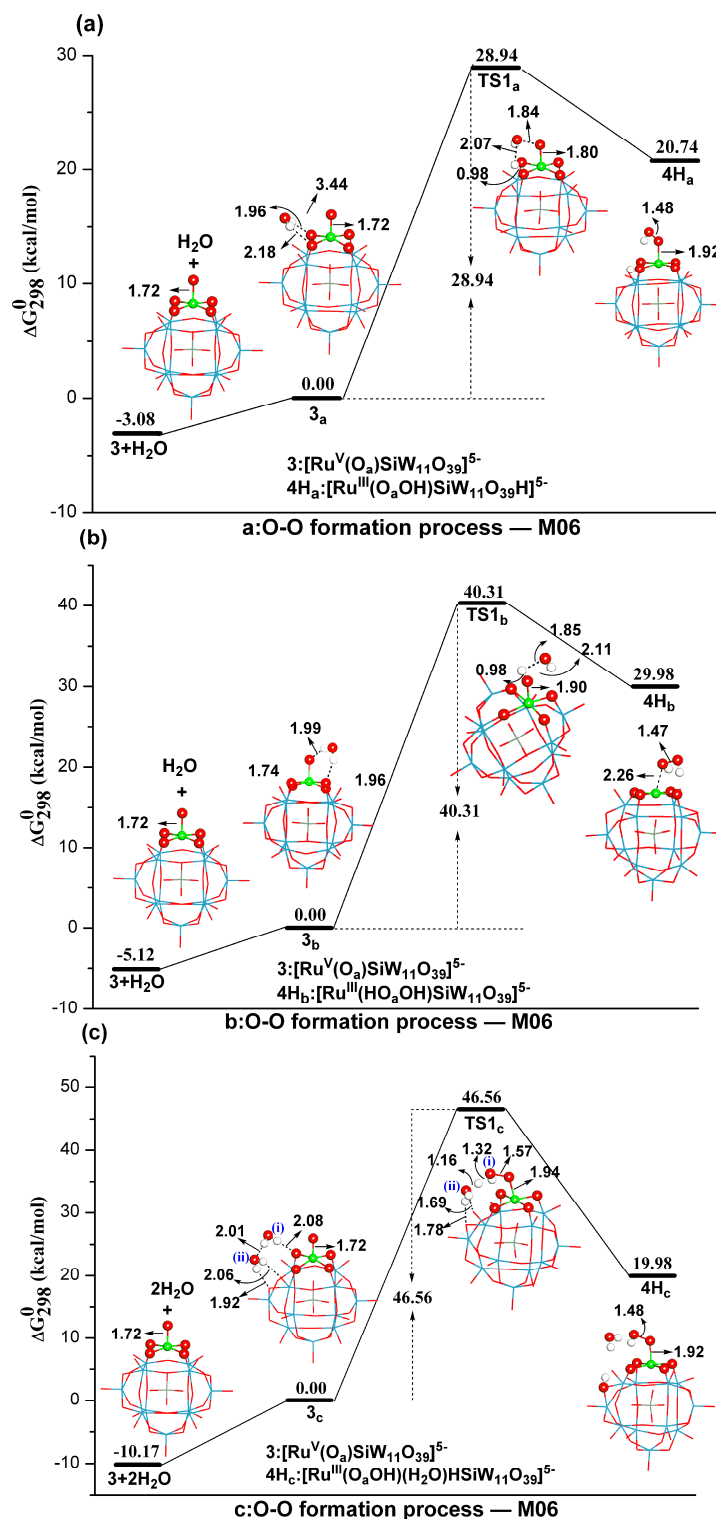

**Fig. S4** Calculated energy profile for the O-O bond formation by pathways **a**, **b**, and **c**. The relative energies with solvation correction at UM06(SMD)/[6-311+g\*\*/LANL2DZ(W, Ru)] level are given in kcal/mol.

**Table S2** The Calculated relative energy of some important intermediates in different spin states at B3LYP(SMD)[6-311+g\*\*/LANL2DZ(W, Ru)] level.

| complex | Spin state         | Relative energy (kcal/mol) |
|---------|--------------------|----------------------------|
| 3       | Doublet            | 0.00                       |
|         | Quartet            | 5.86                       |
| 4       | Doublet            | 0.00                       |
|         | Quartet            | 15.96                      |
| 5       | Triplet            | 0.00                       |
|         | BS Singlet         | 9.53                       |
|         | Singlet            | 9.43                       |
|         | Quintet            | 21.49                      |
|         | Singlet - $\eta^2$ | 9.85                       |
| 6       | Quartet            | 0.00                       |
|         | Doublet            | 10.80                      |
|         | Sextet             | 14.27                      |
|         | Doublet - $\eta^2$ | 19.48                      |

**Optimized coordinates (xyz) optimized in gas phase**

**1**([Ru<sup>III</sup>(H<sub>2</sub>O)SiW<sub>11</sub>O<sub>39</sub>]<sup>5-</sup>) (Multiplicity = 2)

55

|    |           |           |           |
|----|-----------|-----------|-----------|
| O  | -0.942637 | 1.340786  | -0.051960 |
| Si | -0.000310 | 0.000027  | -0.090963 |
| O  | 1.058512  | 0.000297  | 1.162799  |
| O  | 0.891903  | -0.000788 | -1.497081 |
| Ru | -0.104476 | -0.000843 | -3.311269 |
| O  | 1.328861  | -1.408567 | -3.650919 |
| W  | 2.422000  | -1.714387 | -2.194344 |
| O  | 1.072272  | -2.940721 | -1.464042 |
| W  | -0.113303 | -3.545332 | -0.104473 |
| O  | 1.233749  | -2.914030 | 1.134441  |
| W  | 2.664293  | -1.705380 | 1.553914  |
| O  | 2.985699  | -1.628601 | -0.309766 |
| O  | -0.943142 | -1.340305 | -0.050810 |
| O  | 3.556537  | 0.000249  | 1.777053  |
| W  | 2.663329  | 1.707139  | 1.552967  |
| O  | 1.786363  | 1.334250  | 3.254354  |
| W  | 0.416774  | 0.000654  | 3.468897  |
| O  | 1.786000  | -1.332743 | 3.255261  |
| O  | 2.986351  | 1.626739  | -0.310747 |
| W  | 2.423988  | 1.710306  | -2.195330 |
| O  | 1.329846  | 1.405381  | -3.651511 |

|   |           |           |           |
|---|-----------|-----------|-----------|
| O | 3.599082  | 2.793496  | -2.861870 |
| O | 1.074170  | 2.939124  | -1.466497 |
| W | -0.112390 | 3.545661  | -0.109868 |
| O | -1.639827 | 3.471537  | -1.276738 |
| W | -2.711008 | 1.862357  | -1.595417 |
| O | -3.200988 | -0.000252 | -1.413944 |
| W | -2.710721 | -1.864459 | -1.594511 |
| O | -1.640878 | -3.472037 | -1.273703 |
| O | 3.301777  | -0.002236 | -2.442777 |
| O | 3.906444  | 2.780300  | 2.099179  |
| O | 1.234581  | 2.914902  | 1.131929  |
| O | 0.186222  | 5.249809  | -0.120045 |
| O | -1.375882 | 3.455144  | 1.377109  |
| W | -2.367727 | 1.873850  | 1.824349  |
| O | -3.387410 | 2.131092  | 0.233730  |
| O | -3.461351 | 2.497919  | 3.010543  |
| O | -0.886877 | 1.301723  | 2.924868  |
| O | -2.823551 | 0.001651  | 1.788106  |
| W | -2.369881 | -1.869927 | 1.825420  |
| O | -3.388659 | -2.129343 | 0.234932  |
| O | -4.048050 | 2.533943  | -2.473315 |
| O | -1.572251 | 1.374827  | -2.975146 |
| O | 0.238077  | 0.001411  | 5.190030  |
| O | -0.887758 | -1.299163 | 2.925863  |
| O | 3.906668  | -2.778935 | 2.101006  |
| O | 3.596370  | -2.798829 | -2.860134 |
| O | -1.572841 | -1.376079 | -2.974398 |
| O | -3.463828 | -2.492566 | 3.012073  |
| O | -1.378034 | -3.452840 | 1.380125  |
| O | 0.184371  | -5.249650 | -0.113519 |
| O | -4.048045 | -2.535970 | -2.472023 |
| O | -1.442163 | -0.000770 | -5.216433 |
| H | -1.857106 | -0.761610 | -4.748427 |
| H | -1.855402 | 0.761518  | -4.749173 |

**2([Ru<sup>IV</sup>(H<sub>2</sub>O)SiW<sub>11</sub>O<sub>39</sub>]<sup>4-</sup>) (Multiplicity = 3)**

55

|    |           |           |           |
|----|-----------|-----------|-----------|
| O  | 1.203460  | -1.126622 | -0.065511 |
| Si | 0.029366  | 0.004321  | -0.072467 |
| O  | -1.011160 | -0.195760 | 1.166803  |
| O  | -0.860793 | -0.155166 | -1.485438 |
| Ru | 0.030990  | -0.052673 | -3.290934 |
| O  | -1.637537 | 1.046250  | -3.652771 |
| W  | -2.750168 | 1.197863  | -2.173792 |

|   |           |           |           |
|---|-----------|-----------|-----------|
| O | -1.668017 | 2.658781  | -1.495242 |
| W | -0.597612 | 3.509677  | -0.155521 |
| O | -1.762212 | 2.628461  | 1.102644  |
| W | -2.917948 | 1.166003  | 1.567495  |
| O | -3.247487 | 0.990737  | -0.293230 |
| O | 0.674231  | 1.504582  | -0.066128 |
| O | -3.443403 | -0.683689 | 1.827088  |
| W | -2.237835 | -2.176413 | 1.652089  |
| O | -1.422801 | -1.611671 | 3.302604  |
| W | -0.341280 | -0.018374 | 3.469035  |
| O | -1.950610 | 1.000625  | 3.250907  |
| O | -2.619944 | -2.204405 | -0.248037 |
| W | -2.082295 | -2.189640 | -2.077957 |
| O | -1.021071 | -1.639529 | -3.594610 |
| O | -2.989538 | -3.483140 | -2.758270 |
| O | -0.476089 | -3.074601 | -1.423340 |
| W | 0.819885  | -3.454462 | -0.065799 |
| O | 2.283330  | -3.111207 | -1.269647 |
| W | 3.000448  | -1.342653 | -1.636164 |
| O | 3.071269  | 0.592735  | -1.507076 |
| W | 2.248752  | 2.323576  | -1.634964 |
| O | 0.879675  | 3.683261  | -1.382150 |
| O | -3.232667 | -0.688079 | -2.392355 |
| O | -3.228673 | -3.464295 | 2.219950  |
| O | -0.621416 | -3.076677 | 1.169543  |
| O | 0.841659  | -5.175794 | -0.057474 |
| O | 2.055654  | -3.082238 | 1.385424  |
| W | 2.732715  | -1.326268 | 1.782157  |
| O | 3.753134  | -1.410407 | 0.171852  |
| O | 3.940637  | -1.695461 | 2.951170  |
| O | 1.180919  | -1.027756 | 2.897386  |
| O | 2.806085  | 0.603984  | 1.706493  |
| W | 1.977558  | 2.334539  | 1.755868  |
| O | 2.913840  | 2.773772  | 0.100104  |
| O | 4.416579  | -1.724990 | -2.545249 |
| O | 1.748909  | -1.118578 | -3.006064 |
| O | -0.134918 | 0.043117  | 5.176473  |
| O | 0.670994  | 1.519223  | 2.888168  |
| O | -4.334122 | 1.974990  | 2.118763  |
| O | -4.121267 | 1.997910  | -2.841761 |
| O | 1.087717  | 1.528076  | -2.958219 |
| O | 2.958088  | 3.185429  | 2.885879  |
| O | 0.706263  | 3.694032  | 1.277358  |
| O | -1.223486 | 5.112730  | -0.183196 |

|   |          |           |           |
|---|----------|-----------|-----------|
| O | 3.349979 | 3.174695  | -2.655799 |
| O | 1.191836 | 0.049860  | -5.232617 |
| H | 1.521877 | 0.938312  | -5.000133 |
| H | 1.822837 | -0.551300 | -4.760739 |

**3([Ru<sup>V</sup>(O<sub>a</sub>)SiW<sub>11</sub>O<sub>39</sub>]<sup>5-</sup>) (Multiplicity = 2)**

53

|   |           |           |           |
|---|-----------|-----------|-----------|
| O | -0.836447 | -0.607876 | -1.402387 |
| O | -0.760914 | -0.428056 | 1.294097  |
| O | 1.520171  | -0.638061 | -0.119546 |
| O | 0.075064  | 1.628045  | -0.204247 |
| W | -3.107346 | -0.048728 | -1.927131 |
| W | -1.294385 | -2.918698 | -1.705102 |
| W | 0.012713  | 0.191413  | 3.477818  |
| W | -2.982890 | 0.217704  | 1.827913  |
| W | -1.156493 | -2.650077 | 2.022890  |
| W | 1.168132  | 3.038949  | 1.381277  |
| W | 1.082060  | 2.744760  | -2.003392 |
| W | -1.822453 | 3.060293  | -0.258592 |
| W | 3.196441  | -0.099931 | 1.509741  |
| W | 3.068125  | -0.379180 | -1.918676 |
| W | 2.005339  | -2.944249 | 0.077426  |
| O | -2.974410 | -1.988147 | -1.909798 |
| O | -0.688148 | -2.250938 | -3.345270 |
| O | -2.233003 | 0.056115  | -3.546223 |
| O | -2.796145 | -1.663450 | 2.277548  |
| O | -1.870233 | 0.569382  | 3.397075  |
| O | -0.449425 | -1.680438 | 3.545860  |
| O | 3.121335  | -2.234743 | -1.321231 |
| O | 3.149650  | -2.022160 | 1.343052  |
| O | 4.014761  | 0.005290  | -0.173462 |
| O | -0.629513 | 3.631563  | -1.647429 |
| O | -0.550116 | 3.824807  | 1.000089  |
| O | 1.718641  | 3.604557  | -0.388935 |
| O | -4.748502 | 0.160826  | -2.434371 |
| O | -1.752525 | -4.516973 | -2.184927 |
| O | 0.333030  | 0.485355  | 5.152208  |
| O | -4.548460 | 0.526289  | 2.498220  |
| O | -1.575707 | -4.146367 | 2.784436  |
| O | 4.555361  | 0.091224  | 2.563503  |
| O | 4.475832  | -0.323291 | -2.927937 |
| O | 2.654634  | -4.543860 | 0.189564  |
| O | 1.878793  | 4.293514  | 2.336771  |
| O | 1.703231  | 3.824067  | -3.206882 |



|    |           |           |           |
|----|-----------|-----------|-----------|
| O  | -2.995827 | 4.330257  | -0.309170 |
| O  | 2.514318  | 1.476335  | -1.830959 |
| O  | 0.150458  | 1.482802  | -3.057201 |
| O  | 1.744097  | -0.715468 | -3.127430 |
| O  | 2.559201  | 1.719174  | 1.349626  |
| O  | 0.344425  | 1.937340  | 2.708398  |
| O  | 1.729543  | -0.262103 | 2.795800  |
| O  | -2.482801 | 1.960575  | 1.175278  |
| O  | -2.596309 | 1.757764  | -1.427405 |
| O  | -3.366024 | -0.219043 | 0.043969  |
| O  | 0.644088  | -2.978663 | 1.451107  |
| O  | 0.555281  | -3.185383 | -1.137616 |
| O  | -1.645770 | -2.968856 | 0.207514  |
| Si | -0.000297 | -0.013662 | -0.103127 |
| Ru | -0.215598 | -0.337676 | -3.572196 |
| O  | -0.023389 | -0.327094 | -5.284458 |

**4** (Multiplicity = 2)

55

|   |           |           |           |
|---|-----------|-----------|-----------|
| O | 1.336253  | -0.012641 | 1.056991  |
| O | 0.415242  | -0.644254 | -1.400822 |
| O | -1.199742 | -0.863348 | 0.749851  |
| O | -0.476581 | 1.565929  | -0.148330 |
| W | 3.438803  | 1.076966  | 0.593303  |
| W | 2.496268  | -2.018923 | 1.723349  |
| W | -1.111455 | -0.859552 | -3.235969 |
| W | 2.114601  | 0.207517  | -2.830976 |
| W | 1.185080  | -2.871568 | -1.701545 |
| W | -2.352170 | 2.220111  | -1.514600 |
| W | -1.176088 | 2.979693  | 1.637646  |
| W | 0.869278  | 3.259458  | -1.100394 |
| W | -3.374708 | -1.169502 | -0.263930 |
| W | -2.178663 | -0.342528 | 2.887658  |
| W | -1.065017 | -3.156459 | 1.255133  |
| O | 3.832641  | -0.761389 | 1.046657  |
| O | 2.307123  | -1.059433 | 3.264227  |
| O | 3.119450  | 1.524430  | 2.348548  |
| O | 2.338304  | -1.716346 | -2.757115 |
| O | 0.544874  | -0.136820 | -3.932682 |
| O | -0.173775 | -2.545375 | -3.056750 |
| O | -1.886175 | -2.294985 | 2.750246  |
| O | -2.737274 | -2.907791 | 0.292768  |
| O | -3.669640 | -0.719994 | 1.516174  |
| O | 0.010366  | 4.007341  | 0.435390  |

|    |           |           |           |
|----|-----------|-----------|-----------|
| O  | -0.859469 | 3.348789  | -1.994700 |
| O  | -2.503031 | 3.148003  | 0.107516  |
| O  | 5.036007  | 1.729583  | 0.385656  |
| O  | 3.507457  | -3.328383 | 2.257350  |
| O  | -1.971356 | -1.146597 | -4.720525 |
| O  | 3.264785  | 0.596899  | -4.076746 |
| O  | 1.756556  | -4.427302 | -2.230498 |
| O  | -4.979829 | -1.579227 | -0.792929 |
| O  | -3.225247 | -0.282752 | 4.280747  |
| O  | -1.252860 | -4.817743 | 1.730407  |
| O  | -3.617117 | 2.961249  | -2.449244 |
| O  | -1.806696 | 4.278211  | 2.611563  |
| O  | 1.608994  | 4.690094  | -1.753601 |
| O  | -2.247239 | 1.462542  | 2.191267  |
| O  | 0.228241  | 2.386997  | 2.603908  |
| O  | -0.554930 | -0.071921 | 3.591954  |
| O  | -3.254328 | 0.693737  | -0.759166 |
| O  | -1.654299 | 0.913256  | -2.787767 |
| O  | -2.352034 | -1.441521 | -1.919294 |
| O  | 1.371566  | 1.933389  | -2.415722 |
| O  | 2.290113  | 2.531073  | -0.044465 |
| O  | 3.125126  | 0.398784  | -1.257607 |
| O  | -0.214460 | -3.348946 | -0.479707 |
| O  | 0.697209  | -2.769809 | 1.893793  |
| O  | 2.241954  | -2.533612 | -0.181876 |
| Si | 0.013757  | 0.007300  | 0.057739  |
| Ru | 1.316059  | 0.730628  | 3.094187  |
| O  | 1.628133  | 1.305755  | 4.915718  |
| O  | 2.978513  | 1.907349  | 5.082290  |
| H  | 3.279338  | 1.898540  | 4.143735  |

**3<sub>a</sub>**(Multiplicity = 2)

56

|   |           |           |           |
|---|-----------|-----------|-----------|
| O | 0.498373  | 1.092213  | -1.220768 |
| O | -0.605739 | 0.808651  | 1.230175  |
| O | -1.162302 | -0.964310 | -0.699598 |
| O | 1.295997  | -0.902252 | 0.385650  |
| W | 2.111527  | 2.785560  | -0.802425 |
| W | -0.945888 | 2.672035  | -2.298884 |
| W | -1.496437 | -0.276067 | 3.174791  |
| W | 0.614039  | 2.324357  | 2.588820  |
| W | -2.458171 | 2.285056  | 1.126158  |
| W | 1.173989  | -2.649806 | 2.028776  |
| W | 2.571842  | -2.275208 | -1.093661 |

|    |           |           |           |
|----|-----------|-----------|-----------|
| W  | 3.246568  | -0.031770 | 1.399518  |
| W  | -2.235883 | -2.737806 | 0.491947  |
| W  | -0.823527 | -2.335548 | -2.575160 |
| W  | -3.246117 | -0.187332 | -1.535700 |
| O  | 0.609523  | 3.648732  | -1.623732 |
| O  | 0.059502  | 1.964280  | -3.674158 |
| O  | 2.586231  | 1.963489  | -2.444391 |
| O  | -1.104440 | 3.145941  | 2.195112  |
| O  | -0.334808 | 1.150474  | 3.787687  |
| O  | -2.741259 | 1.088204  | 2.646708  |
| O  | -2.527037 | -1.433667 | -2.823728 |
| O  | -3.612019 | -1.727040 | -0.417881 |
| O  | -1.717556 | -3.423391 | -1.237226 |
| O  | 3.806649  | -1.299005 | 0.084944  |
| O  | 2.669014  | -1.537643 | 2.492299  |
| O  | 2.145594  | -3.325608 | 0.570737  |
| O  | 3.261041  | 4.076145  | -0.790145 |
| O  | -1.782877 | 3.936290  | -3.130709 |
| O  | -2.175967 | -0.772883 | 4.685198  |
| O  | 1.244760  | 3.474734  | 3.715698  |
| O  | -3.776281 | 3.380171  | 1.363216  |
| O  | -3.169649 | -4.067214 | 1.083295  |
| O  | -0.871855 | -3.409320 | -3.931430 |
| O  | -4.816424 | 0.079716  | -2.208264 |
| O  | 1.354306  | -3.926464 | 3.181031  |
| O  | 3.657463  | -3.427737 | -1.794424 |
| O  | 4.759255  | 0.320997  | 2.156185  |
| O  | 0.858020  | -2.834513 | -1.738396 |
| O  | 2.628344  | -0.908639 | -2.322073 |
| O  | 0.069717  | -0.842871 | -3.280670 |
| O  | -0.492773 | -3.138171 | 1.158037  |
| O  | 0.026298  | -1.406447 | 3.005130  |
| O  | -2.351492 | -1.489974 | 1.946999  |
| O  | 2.026731  | 1.057282  | 2.463504  |
| O  | 3.096082  | 1.361736  | 0.115818  |
| O  | 1.258943  | 3.006220  | 0.913738  |
| O  | -3.278582 | 0.916396  | 0.024093  |
| O  | -2.226666 | 1.225362  | -2.347578 |
| O  | -1.673089 | 2.911231  | -0.461969 |
| Si | 0.006536  | 0.008316  | -0.069104 |
| Ru | 1.435222  | 0.526082  | -3.199665 |
| O  | 2.141934  | 0.426292  | -4.769917 |
| O  | 5.098883  | 0.685276  | -3.032125 |
| H  | 4.412045  | 1.349750  | -2.834652 |

H 4.608258 -0.112138 -2.770503

TS1<sub>a</sub> (Multiplicity = 2)

56

|   |           |           |           |
|---|-----------|-----------|-----------|
| O | 0.719312  | 1.114821  | 1.086244  |
| O | 0.878744  | -0.102235 | -1.321553 |
| O | -0.036393 | -1.434070 | 0.831850  |
| O | -1.530098 | 0.504116  | -0.288029 |
| W | 1.111138  | 3.428188  | 0.527881  |
| W | 2.945602  | 0.939313  | 1.976241  |
| W | 0.393501  | -1.593163 | -3.140872 |
| W | 1.239837  | 1.696415  | -2.815612 |
| W | 3.184252  | -0.714713 | -1.400819 |
| W | -2.973618 | -0.707023 | -1.833414 |
| W | -3.347266 | 0.709894  | 1.233895  |
| W | -2.045433 | 2.553350  | -1.335033 |
| W | -1.004875 | -3.395075 | -0.147616 |
| W | -1.114349 | -1.841821 | 2.918453  |
| W | 1.879252  | -2.629917 | 1.497066  |
| O | 2.769765  | 2.720014  | 1.167486  |
| O | 1.940710  | 1.431448  | 3.409862  |
| O | 0.360717  | 3.494885  | 2.207575  |
| O | 2.957336  | 0.784254  | -2.568948 |
| O | 0.735403  | 0.150694  | -3.886670 |
| O | 2.238810  | -1.773796 | -2.790871 |
| O | 0.585222  | -2.729362 | 2.957903  |
| O | 0.721375  | -3.880688 | 0.561304  |
| O | -1.685246 | -3.254420 | 1.594789  |
| O | -3.278920 | 2.325668  | 0.130152  |
| O | -3.076923 | 1.146821  | -2.256588 |
| O | -4.055458 | -0.231284 | -0.217193 |
| O | 1.509068  | 5.092673  | 0.280128  |
| O | 4.544255  | 1.027269  | 2.631275  |
| O | 0.235014  | -2.541568 | -4.578481 |
| O | 1.680027  | 2.796838  | -4.075990 |
| O | 4.809470  | -1.173627 | -1.776639 |
| O | -1.591563 | -4.951555 | -0.620661 |
| O | -1.895884 | -2.527135 | 4.303615  |
| O | 3.064629  | -3.726768 | 2.113953  |
| O | -4.246644 | -1.354620 | -2.807645 |
| O | -4.788214 | 1.021915  | 2.135950  |
| O | -2.741512 | 3.941951  | -2.095259 |
| O | -2.593548 | -0.767833 | 2.069978  |
| O | -2.071537 | 1.810645  | 2.428464  |

|    |           |           |           |
|----|-----------|-----------|-----------|
| O  | -0.487378 | -0.272318 | 3.553927  |
| O  | -2.395354 | -2.232057 | -0.818750 |
| O  | -1.471004 | -0.961203 | -2.912908 |
| O  | -0.065632 | -2.824744 | -1.774153 |
| O  | -0.613453 | 2.102376  | -2.560086 |
| O  | -0.718801 | 3.322393  | -0.248156 |
| O  | 1.571237  | 2.693678  | -1.253124 |
| O  | 2.640909  | -2.125487 | -0.172698 |
| O  | 2.511606  | -0.947350 | 2.161534  |
| O  | 3.389612  | 0.360446  | 0.098080  |
| Si | 0.006319  | 0.022583  | 0.069362  |
| Ru | -0.088502 | 1.661399  | 3.060045  |
| O  | -0.533972 | 2.421886  | 4.625231  |
| O  | -1.585022 | 3.888817  | 4.244983  |
| H  | -0.913854 | 4.174457  | 3.593219  |
| H  | -2.320919 | 2.712859  | 2.702177  |

**4H<sub>a</sub>** (Multiplicity = 2)

56

|   |           |           |           |
|---|-----------|-----------|-----------|
| O | -1.371590 | -0.398130 | 0.930593  |
| O | -0.358312 | -0.043486 | -1.543863 |
| O | 0.455142  | 1.508215  | 0.506325  |
| O | 1.202273  | -1.071980 | 0.382666  |
| W | -2.589022 | -2.458298 | 0.748994  |
| W | -3.453375 | 0.849721  | 0.854421  |
| W | 1.193672  | 0.477073  | -3.302156 |
| W | -1.098015 | -1.982315 | -2.690668 |
| W | -2.033286 | 1.286887  | -2.596882 |
| W | 3.360860  | -1.031442 | -0.695067 |
| W | 2.252679  | -1.391907 | 2.496107  |
| W | 1.000665  | -3.402178 | 0.013956  |
| W | 2.407668  | 2.565880  | -0.404595 |
| W | 1.015104  | 2.186211  | 2.739452  |
| W | -0.830546 | 3.449985  | 0.165458  |
| O | -3.867695 | -1.049670 | 0.555744  |
| O | -3.165803 | 0.558661  | 2.627471  |
| O | -2.449251 | -2.244826 | 2.573816  |
| O | -2.211478 | -0.506904 | -3.283753 |
| O | 0.321632  | -1.177799 | -3.759157 |
| O | -0.403289 | 1.398765  | -3.717334 |
| O | -0.058350 | 3.573569  | 1.941225  |
| O | 0.954556  | 3.823884  | -0.512716 |
| O | 2.483068  | 2.767106  | 1.448147  |
| O | 1.768500  | -3.153145 | 1.777580  |

|    |           |           |           |
|----|-----------|-----------|-----------|
| O  | 2.745976  | -2.844233 | -0.681889 |
| O  | 3.658551  | -1.292831 | 1.277876  |
| O  | -3.589290 | -3.867043 | 0.668943  |
| O  | -5.037693 | 1.541154  | 0.869461  |
| O  | 2.119198  | 0.776378  | -4.732186 |
| O  | -1.629805 | -3.212117 | -3.785133 |
| O  | -3.130023 | 2.130549  | -3.635341 |
| O  | 3.717036  | 3.570145  | -0.922149 |
| O  | 1.653032  | 2.996642  | 4.132523  |
| O  | -1.523633 | 5.029922  | 0.060266  |
| O  | 4.996991  | -1.237887 | -1.215418 |
| O  | 3.088415  | -1.874903 | 3.931222  |
| O  | 1.165257  | -5.117685 | -0.134237 |
| O  | 2.010479  | 0.427771  | 2.747709  |
| O  | 0.283231  | -1.615025 | 3.155288  |
| O  | -0.367466 | 1.268546  | 3.409327  |
| O  | 3.277969  | 0.835427  | -0.287884 |
| O  | 2.473687  | -0.656487 | -2.290290 |
| O  | 1.770454  | 1.841061  | -2.125035 |
| O  | 0.265350  | -2.919813 | -1.685096 |
| O  | -0.754279 | -3.228339 | 0.722549  |
| O  | -2.199069 | -2.241070 | -1.195719 |
| O  | -1.271815 | 2.720984  | -1.554444 |
| O  | -2.296249 | 2.416119  | 0.826743  |
| O  | -3.086985 | 0.886702  | -1.115743 |
| Si | -0.015586 | -0.004239 | 0.066611  |
| Ru | -1.459548 | -0.451956 | 3.100545  |
| O  | -1.805403 | -0.624876 | 4.985087  |
| O  | -2.763036 | -1.709998 | 5.280443  |
| H  | -2.856616 | -2.109943 | 4.385879  |
| H  | -0.021200 | -2.483139 | 2.841176  |

**3<sub>b</sub>** (Multiplicity = 2)

56

|   |           |           |           |
|---|-----------|-----------|-----------|
| O | 1.387727  | -0.620416 | 0.746935  |
| O | -0.212862 | -0.662430 | -1.430810 |
| O | -1.269118 | -0.348583 | 1.024004  |
| O | 0.169676  | 1.628373  | -0.095311 |
| W | 3.577710  | -0.459834 | -0.203012 |
| W | 1.693103  | -2.951491 | 1.157206  |
| W | -2.042538 | -0.111857 | -2.878957 |
| W | 1.338273  | -0.468672 | -3.219987 |
| W | -0.517317 | -2.976964 | -1.858617 |
| W | -1.482791 | 3.070434  | -1.032711 |

|    |           |           |           |
|----|-----------|-----------|-----------|
| W  | 0.489913  | 3.064936  | 1.736925  |
| W  | 1.890807  | 2.692175  | -1.345630 |
| W  | -3.515280 | 0.350859  | 0.536889  |
| W  | -1.465846 | 0.332610  | 3.297397  |
| W  | -2.012601 | -2.534435 | 1.524718  |
| O  | 3.276714  | -2.318630 | 0.227129  |
| O  | 2.224521  | -2.042170 | 2.705095  |
| O  | 3.825421  | -0.033684 | 1.598073  |
| O  | 0.758974  | -2.321284 | -3.147656 |
| O  | -0.426769 | -0.068737 | -3.932891 |
| O  | -1.877198 | -2.033412 | -2.868741 |
| O  | -2.034060 | -1.525124 | 3.165273  |
| O  | -3.572904 | -1.532921 | 0.979089  |
| O  | -3.197256 | 0.736478  | 2.346107  |
| O  | 1.767495  | 3.589081  | 0.339982  |
| O  | 0.204189  | 3.557902  | -1.810377 |
| O  | -0.869046 | 3.876011  | 0.615597  |
| O  | 5.221586  | -0.501375 | -0.732620 |
| O  | 2.183354  | -4.559245 | 1.560805  |
| O  | -3.236007 | 0.085129  | -4.114416 |
| O  | 2.256012  | -0.502274 | -4.685601 |
| O  | -0.758736 | -4.583631 | -2.451506 |
| O  | -5.205621 | 0.691186  | 0.407984  |
| O  | -2.006746 | 0.718782  | 4.896536  |
| O  | -2.759463 | -3.996087 | 2.067833  |
| O  | -2.488889 | 4.340215  | -1.636121 |
| O  | 0.768960  | 4.350396  | 2.860818  |
| O  | 2.995285  | 3.729076  | -2.177703 |
| O  | -0.882476 | 2.054109  | 2.609481  |
| O  | 1.737904  | 1.765334  | 2.308446  |
| O  | 0.279295  | -0.127016 | 3.576051  |
| O  | -2.728522 | 2.023140  | -0.004203 |
| O  | -1.695211 | 1.721618  | -2.376278 |
| O  | -3.089262 | -0.192210 | -1.295252 |
| O  | 1.489694  | 1.371975  | -2.695674 |
| O  | 3.057597  | 1.373165  | -0.609952 |
| O  | 2.644504  | -0.826287 | -1.900565 |
| O  | -1.687497 | -2.931406 | -0.335878 |
| O  | -0.151023 | -2.925511 | 1.759279  |
| O  | 0.890573  | -3.214629 | -0.596990 |
| Si | 0.014047  | -0.002437 | 0.056649  |
| Ru | 2.155808  | -0.059412 | 2.784125  |
| O  | 2.987302  | 0.130327  | 4.301317  |
| O  | 5.777071  | 0.320570  | 3.669938  |

|   |          |          |          |
|---|----------|----------|----------|
| H | 5.419064 | 0.244440 | 2.763911 |
| H | 4.933045 | 0.263104 | 4.151362 |

**TS1<sub>b</sub>** (Multiplicity = 2)

56

|   |           |           |           |
|---|-----------|-----------|-----------|
| O | 1.033456  | -0.761383 | 1.097251  |
| O | -0.384406 | -1.030659 | -1.163659 |
| O | -1.347799 | 0.458608  | 0.856851  |
| O | 0.759444  | 1.333910  | -0.559627 |
| W | 3.153912  | -1.692870 | 0.397539  |
| W | 0.529977  | -2.727541 | 2.360536  |
| W | -1.910140 | -0.473137 | -2.920760 |
| W | 1.133576  | -1.978992 | -2.726708 |
| W | -1.437261 | -3.125678 | -0.813879 |
| W | -0.279858 | 2.807793  | -2.148064 |
| W | 1.553175  | 3.182602  | 0.752953  |
| W | 2.739115  | 1.284214  | -1.841497 |
| W | -3.191477 | 1.612107  | -0.115846 |
| W | -1.315512 | 1.926610  | 2.724278  |
| W | -2.800828 | -1.051096 | 1.965741  |
| O | 2.272859  | -2.998380 | 1.474514  |
| O | 1.366435  | -1.600710 | 3.567679  |
| O | 3.469168  | -0.646865 | 2.014430  |
| O | -0.006382 | -3.410564 | -2.078554 |
| O | -0.346632 | -1.344365 | -3.739198 |
| O | -2.383011 | -2.218048 | -2.262275 |
| O | -2.479015 | 0.422778  | 3.160025  |
| O | -3.907967 | 0.141022  | 0.928901  |
| O | -2.780213 | 2.499551  | 1.502759  |
| O | 2.913171  | 2.717619  | -0.602585 |
| O | 1.468729  | 2.367270  | -2.829567 |
| O | 0.523717  | 3.879954  | -0.833493 |
| O | 4.718708  | -2.399521 | 0.211978  |
| O | 0.404626  | -4.180573 | 3.289552  |
| O | -2.928926 | -0.363829 | -4.313756 |
| O | 2.022662  | -2.821852 | -3.946863 |
| O | -2.212553 | -4.670241 | -0.878250 |
| O | -4.656665 | 2.409328  | -0.570952 |
| O | -1.663415 | 2.967391  | 4.064421  |
| O | -4.019989 | -1.902563 | 2.846334  |
| O | -0.776952 | 3.996713  | -3.300395 |
| O | 2.162702  | 4.707931  | 1.299885  |
| O | 4.154718  | 1.530963  | -2.801826 |
| O | -0.135602 | 3.032241  | 1.645942  |



|    |           |           |           |
|----|-----------|-----------|-----------|
| O  | 2.308254  | 2.014158  | 1.944478  |
| O  | 0.166468  | 1.000808  | 3.284036  |
| O  | -1.868669 | 2.628348  | -1.051495 |
| O  | -0.941304 | 1.167652  | -2.977220 |
| O  | -2.977294 | 0.333131  | -1.574989 |
| O  | 1.944036  | -0.263699 | -2.737839 |
| O  | 3.339756  | -0.006950 | -0.566284 |
| O  | 2.246130  | -2.298113 | -1.150896 |
| O  | -2.574882 | -2.160106 | 0.418972  |
| O  | -1.189395 | -1.911321 | 2.613097  |
| O  | -0.247638 | -3.317042 | 0.633888  |
| Si | 0.007219  | 0.008628  | 0.045799  |
| Ru | 1.937218  | 0.185387  | 2.787389  |
| O  | 2.820925  | 0.811137  | 4.352472  |
| O  | 4.933497  | 0.794217  | 4.258059  |
| H  | 4.831536  | 0.282698  | 3.434608  |
| H  | 3.297592  | 1.639029  | 4.135083  |

**4H<sub>b</sub>**(Multiplicity = 2)

56

|   |           |           |           |
|---|-----------|-----------|-----------|
| O | 1.075973  | 0.424741  | 1.241279  |
| O | 0.843264  | -0.720969 | -1.154251 |
| O | -1.107529 | -1.033631 | 0.683790  |
| O | -0.761979 | 1.347491  | -0.501367 |
| W | 2.941054  | 1.944988  | 0.924363  |
| W | 2.442569  | -1.056797 | 2.518588  |
| W | -0.157379 | -1.624213 | -3.124904 |
| W | 2.542729  | 0.336262  | -2.437918 |
| W | 2.174180  | -2.664548 | -0.859394 |
| W | -2.362049 | 1.278142  | -2.311392 |
| W | -2.211043 | 2.774080  | 0.783466  |
| W | 0.334075  | 3.189279  | -1.485478 |
| W | -2.883069 | -2.015428 | -0.598222 |
| W | -2.610858 | -0.504926 | 2.482467  |
| W | -0.563174 | -3.122689 | 1.633759  |
| O | 3.583981  | 0.425822  | 1.881377  |
| O | 1.686967  | 0.087325  | 3.750180  |
| O | 2.034808  | 2.578348  | 2.477549  |
| O | 3.207494  | -1.413742 | -1.901217 |
| O | 1.401001  | -0.577163 | -3.675468 |
| O | 1.084627  | -2.927992 | -2.464273 |
| O | -1.844024 | -2.274872 | 2.793658  |
| O | -2.010464 | -3.435398 | 0.393394  |
| O | -3.641160 | -1.402200 | 1.007462  |

|    |           |           |           |
|----|-----------|-----------|-----------|
| O  | -0.998637 | 3.887995  | -0.316077 |
| O  | -1.124153 | 2.685111  | -2.692941 |
| O  | -3.098239 | 2.363016  | -0.925798 |
| O  | 4.322703  | 2.983796  | 0.936830  |
| O  | 3.567127  | -1.933782 | 3.500134  |
| O  | -0.590056 | -2.328551 | -4.644919 |
| O  | 3.815531  | 0.835080  | -3.498237 |
| O  | 3.177567  | -4.070239 | -0.966820 |
| O  | -4.210527 | -2.885284 | -1.286454 |
| O  | -3.867666 | -0.493920 | 3.677905  |
| O  | -0.472105 | -4.681499 | 2.377018  |
| O  | -3.529096 | 1.519641  | -3.564500 |
| O  | -3.305220 | 3.986894  | 1.360506  |
| O  | 0.855081  | 4.644606  | -2.262170 |
| O  | -2.929774 | 1.154021  | 1.494510  |
| O  | -0.918893 | 2.778676  | 2.126279  |
| O  | -1.236862 | 0.322844  | 3.333660  |
| O  | -3.062147 | -0.287813 | -1.404804 |
| O  | -1.153950 | 0.022248  | -3.134807 |
| O  | -1.504312 | -2.282496 | -1.969343 |
| O  | 1.388675  | 1.845293  | -2.438201 |
| O  | 1.625788  | 2.992399  | -0.113576 |
| O  | 3.167536  | 1.006976  | -0.735641 |
| O  | 0.674795  | -3.306947 | 0.170158  |
| O  | 0.886813  | -2.198991 | 2.515412  |
| O  | 2.766839  | -1.862530 | 0.741946  |
| Si | -0.005892 | 0.001264  | 0.049922  |
| Ru | 0.419951  | 1.453532  | 2.914908  |
| O  | -0.030524 | 2.980423  | 4.520629  |
| O  | 1.075640  | 3.943823  | 4.495033  |
| H  | 1.608190  | 3.569139  | 3.724105  |
| H  | -0.643267 | 3.342380  | 3.823443  |

**3<sub>e</sub>** (Multiplicity = 2)

59

|   |           |           |           |
|---|-----------|-----------|-----------|
| O | -0.595420 | 0.967135  | 1.253221  |
| O | 0.850163  | 0.925459  | -1.029056 |
| O | 1.065236  | -1.080913 | 0.753847  |
| O | -1.178873 | -0.795386 | -0.698197 |
| W | -2.157450 | 2.739842  | 0.883178  |
| W | 0.733710  | 2.362642  | 2.638548  |
| W | 1.959530  | 0.055807  | -2.967423 |
| W | -0.149181 | 2.661696  | -2.299052 |
| W | 2.731379  | 2.294021  | -0.525894 |

|    |           |           |           |
|----|-----------|-----------|-----------|
| W  | -0.875275 | -2.312411 | -2.523020 |
| W  | -2.602526 | -2.261547 | 0.394843  |
| W  | -2.970879 | 0.297215  | -1.848896 |
| W  | 2.235932  | -2.759453 | -0.501676 |
| W  | 0.458955  | -2.661547 | 2.441315  |
| W  | 3.041116  | -0.498784 | 1.910231  |
| O  | -0.702431 | 3.458069  | 1.937410  |
| O  | -0.464110 | 1.465688  | 3.754767  |
| O  | -2.863736 | 1.822761  | 2.333588  |
| O  | 1.547215  | 3.338076  | -1.624906 |
| O  | 0.929273  | 1.574968  | -3.522119 |
| O  | 3.178121  | 1.284996  | -2.121080 |
| O  | 2.149977  | -1.878544 | 2.942803  |
| O  | 3.520087  | -1.892817 | 0.651929  |
| O  | 1.495237  | -3.608158 | 1.005324  |
| O  | -3.736952 | -1.072410 | -0.748101 |
| O  | -2.313086 | -1.128303 | -3.000325 |
| O  | -2.101325 | -3.130363 | -1.251055 |
| O  | -3.214140 | 4.102882  | 0.817435  |
| O  | 1.445747  | 3.454619  | 3.773865  |
| O  | 2.835264  | -0.293380 | -4.416189 |
| O  | -0.579410 | 3.958892  | -3.358356 |
| O  | 4.094840  | 3.353719  | -0.442244 |
| O  | 3.211887  | -4.026173 | -1.158244 |
| O  | 0.363701  | -3.987849 | 3.549409  |
| O  | 4.510591  | -0.377389 | 2.812439  |
| O  | -0.964701 | -3.460347 | -3.811436 |
| O  | -3.896875 | -3.287138 | 0.945696  |
| O  | -4.360109 | 0.794772  | -2.745598 |
| O  | -1.086711 | -2.985610 | 1.252766  |
| O  | -2.681760 | -0.891558 | 1.693804  |
| O  | -0.522770 | -1.380165 | 3.284679  |
| O  | 0.581705  | -2.989537 | -1.476004 |
| O  | 0.377781  | -1.041449 | -3.198185 |
| O  | 2.541570  | -1.325415 | -1.786545 |
| O  | -1.589833 | 1.421301  | -2.581837 |
| O  | -2.989338 | 1.516383  | -0.379003 |
| O  | -0.999089 | 3.125249  | -0.693029 |
| O  | 3.333768  | 0.789161  | 0.515896  |
| O  | 1.954713  | 0.843941  | 2.719575  |
| O  | 1.735721  | 2.786344  | 1.019426  |
| Si | 0.041494  | 0.005953  | 0.067187  |
| Ru | -1.800492 | 0.194090  | 3.016262  |
| O  | -2.700462 | -0.069374 | 4.457226  |

|   |           |           |          |
|---|-----------|-----------|----------|
| O | -5.782534 | 0.974891  | 2.579868 |
| H | -4.849536 | 1.247215  | 2.512627 |
| H | -5.833470 | 0.196352  | 1.993252 |
| O | -6.103572 | -1.363244 | 0.747722 |
| H | -5.559705 | -2.084251 | 1.111487 |
| H | -5.472604 | -1.026518 | 0.077638 |

TS1<sub>c</sub> (Multiplicity = 2)

59

|   |             |             |             |
|---|-------------|-------------|-------------|
| O | 0.48662400  | -0.93376300 | 1.32011100  |
| O | -0.90475600 | -0.93209500 | -0.97534300 |
| O | -0.94696600 | 1.23179900  | 0.66030600  |
| O | 1.25676400  | 0.66662100  | -0.75694200 |
| W | 1.91445400  | -2.91459600 | 1.03107100  |
| W | -0.85597100 | -2.09334200 | 2.89389700  |
| W | -2.02191000 | -0.13546700 | -2.93098700 |
| W | -0.04335500 | -2.80447300 | -2.16458300 |
| W | -2.83811100 | -2.16127700 | -0.31126200 |
| W | 1.02452500  | 2.01134700  | -2.73250400 |
| W | 2.73531600  | 2.17169100  | 0.19741700  |
| W | 2.97903200  | -0.64856000 | -1.80187400 |
| W | -1.99341600 | 2.88953400  | -0.69925200 |
| W | -0.22151800 | 2.88795300  | 2.25766500  |
| W | -2.94800800 | 0.85630200  | 1.86419000  |
| O | 0.47066100  | -3.38054300 | 2.18422100  |
| O | 0.42944000  | -1.31415200 | 3.92743400  |
| O | 2.77485600  | -1.92593300 | 2.37192400  |
| O | -1.77235200 | -3.32651100 | -1.39146600 |
| O | -1.07581800 | -1.75197000 | -3.42151200 |
| O | -3.27227800 | -1.21002700 | -1.99831700 |
| O | -1.95094800 | 2.24320400  | 2.80119900  |
| O | -3.33256000 | 2.19382400  | 0.51859400  |
| O | -1.20099400 | 3.79453900  | 0.73770900  |
| O | 3.87453900  | 0.70019200  | -0.81184500 |
| O | 2.39519400  | 0.70215100  | -3.07911400 |
| O | 2.32887900  | 2.86516100  | -1.54924900 |
| O | 2.87746700  | -4.35249300 | 1.04456300  |
| O | -1.68524900 | -3.07828900 | 4.05343000  |
| O | -2.88297600 | 0.18393200  | -4.39931200 |
| O | 0.28110700  | -4.20199500 | -3.13522600 |
| O | -4.28484800 | -3.09988000 | -0.14763800 |
| O | -2.88807800 | 4.16787400  | -1.45037600 |
| O | -0.03135200 | 4.26986100  | 3.29020100  |
| O | -4.41858600 | 0.91213900  | 2.77515400  |

|    |             |             |             |
|----|-------------|-------------|-------------|
| O  | 1.18186600  | 3.02973500  | -4.12361900 |
| O  | 4.22037300  | 3.03266800  | 0.65537700  |
| O  | 4.30863400  | -1.34942600 | -2.66337500 |
| O  | 1.34267400  | 3.11502300  | 0.99935100  |
| O  | 2.76501900  | 0.92712800  | 1.51537300  |
| O  | 0.69579600  | 1.60060900  | 3.11777500  |
| O  | -0.34842800 | 2.90305500  | -1.70943700 |
| O  | -0.32272200 | 0.80367300  | -3.26445400 |
| O  | -2.43583000 | 1.37868900  | -1.86948300 |
| O  | 1.47240500  | -1.71670600 | -2.47925400 |
| O  | 2.85826500  | -1.78102400 | -0.28331900 |
| O  | 0.76124200  | -3.26601500 | -0.50025800 |
| O  | -3.32586200 | -0.50273400 | 0.58287600  |
| O  | -1.95303900 | -0.50009600 | 2.80733900  |
| O  | -1.89077900 | -2.57871000 | 1.23713200  |
| Si | -0.02989300 | 0.00768200  | 0.05308300  |
| Ru | 1.77488500  | -0.15827300 | 2.83637200  |
| O  | 3.18851600  | 0.20403000  | 4.10786800  |
| O  | 4.48401700  | -0.36569000 | 3.42556700  |
| H  | 4.03332100  | -1.17698700 | 3.00422100  |
| H  | 4.86904600  | 0.31984600  | 2.36507000  |
| O  | 5.38608800  | 0.78596200  | 1.43269400  |
| H  | 5.08087900  | 1.75015900  | 1.34703200  |
| H  | 4.91533300  | 0.43853900  | 0.60727200  |

**4H<sub>c</sub>**(Multiplicity = 2)

59

|   |           |           |           |
|---|-----------|-----------|-----------|
| O | 0.352953  | -0.813641 | 1.421733  |
| O | -1.509260 | -0.445980 | -0.479834 |
| O | 0.041680  | 1.617066  | 0.337623  |
| O | 1.112948  | -0.380502 | -1.127275 |
| W | 0.479496  | -3.202961 | 1.604343  |
| W | -0.888496 | -0.682002 | 3.459730  |
| W | -2.539757 | 0.405460  | -2.435852 |
| W | -2.241371 | -2.667842 | -0.996284 |
| W | -3.501079 | -0.085393 | 0.803832  |
| W | 1.072299  | 0.535666  | -3.329917 |
| W | 3.456877  | 0.200250  | -0.887020 |
| W | 1.304260  | -2.613306 | -2.016193 |
| W | -0.413722 | 3.298512  | -1.302553 |
| W | 1.958657  | 2.859182  | 1.160129  |
| W | -1.370195 | 2.715591  | 1.907327  |
| O | -0.665771 | -2.569318 | 3.019641  |
| O | 0.838043  | -0.509805 | 3.983558  |

|    |           |           |           |
|----|-----------|-----------|-----------|
| O  | 2.021903  | -2.654707 | 2.428809  |
| O  | -3.611125 | -1.911278 | 0.064078  |
| O  | -2.798238 | -1.503507 | -2.453857 |
| O  | -3.843921 | 0.500067  | -1.037213 |
| O  | 0.396152  | 3.445758  | 2.139580  |
| O  | -1.447577 | 3.742949  | 0.236343  |
| O  | 1.152748  | 3.824698  | -0.416598 |
| O  | 3.267424  | -1.882551 | -1.559880 |
| O  | 1.378520  | -1.430577 | -3.473722 |
| O  | 2.887232  | 0.586498  | -2.714482 |
| O  | 0.521898  | -4.899999 | 1.929315  |
| O  | -1.708205 | -0.782288 | 4.979109  |
| O  | -3.501277 | 0.855322  | -3.800714 |
| O  | -2.983425 | -4.156209 | -1.469984 |
| O  | -5.095410 | 0.026640  | 1.464170  |
| O  | -0.715362 | 4.673589  | -2.305617 |
| O  | 3.107424  | 4.065795  | 1.628994  |
| O  | -2.249497 | 3.778008  | 2.947481  |
| O  | 1.284644  | 0.970222  | -4.990016 |
| O  | 5.180990  | 0.304505  | -1.101298 |
| O  | 1.846984  | -4.079437 | -2.756821 |
| O  | 2.962877  | 1.881428  | -0.289893 |
| O  | 3.362041  | -0.597997 | 0.737319  |
| O  | 2.318583  | 1.490914  | 2.262826  |
| O  | 0.682402  | 2.182630  | -2.514055 |
| O  | -0.794440 | 0.135924  | -3.251775 |
| O  | -1.820908 | 2.087615  | -1.877715 |
| O  | -0.527768 | -2.795176 | -2.037577 |
| O  | 1.328294  | -3.091781 | -0.161992 |
| O  | -1.186603 | -3.149908 | 0.456113  |
| O  | -2.802449 | 1.648703  | 1.167112  |
| O  | -1.018102 | 1.241484  | 3.035216  |
| O  | -2.482193 | -0.730385 | 2.221998  |
| Si | -0.005501 | 0.000320  | 0.027414  |
| Ru | 2.240208  | -0.564272 | 2.453457  |
| O  | 3.767097  | -0.661765 | 3.615862  |
| O  | 4.556936  | -1.885465 | 3.326290  |
| H  | 3.841796  | -2.462814 | 2.974539  |
| H  | 5.778577  | -1.360394 | 1.763223  |
| O  | 6.500468  | -1.227088 | 1.121087  |
| H  | 6.077112  | -0.688642 | 0.429600  |
| H  | 3.485032  | -2.341972 | -0.732760 |

$4_{ox}$ (Multiplicity = 3)

55

|   |           |           |           |
|---|-----------|-----------|-----------|
| O | 1.193448  | -0.131328 | 1.184319  |
| O | 0.544842  | -0.613352 | -1.370334 |
| O | -1.323813 | -0.821112 | 0.564123  |
| O | -0.380639 | 1.592368  | -0.141995 |
| W | 3.382175  | 0.855521  | 1.014833  |
| W | 2.150713  | -2.225012 | 1.885475  |
| W | -0.756189 | -0.671467 | -3.367221 |
| W | 2.438494  | 0.197514  | -2.550419 |
| W | 1.231653  | -2.865058 | -1.681194 |
| W | -2.019942 | 2.399973  | -1.678376 |
| W | -1.222522 | 2.974818  | 1.600753  |
| W | 1.163408  | 3.253342  | -0.828892 |
| W | -3.360942 | -0.957692 | -0.694605 |
| W | -2.520893 | -0.345616 | 2.595906  |
| W | -1.371111 | -3.142173 | 0.982023  |
| O | 3.614545  | -0.993736 | 1.522698  |
| O | 1.777948  | -1.252465 | 3.455703  |
| O | 2.804186  | 1.246990  | 2.780923  |
| O | 2.570229  | -1.731770 | -2.506411 |
| O | 1.015291  | -0.018851 | -3.834446 |
| O | 0.074803  | -2.415154 | -3.157655 |
| O | -2.301045 | -2.289234 | 2.419875  |
| O | -2.889454 | -2.754564 | -0.147232 |
| O | -3.837927 | -0.565701 | 1.070588  |
| O | 0.175472  | 3.970869  | 0.640915  |
| O | -0.434437 | 3.477331  | -1.906546 |
| O | -2.318184 | 3.278824  | -0.019265 |
| O | 5.007026  | 1.438938  | 1.099432  |
| O | 3.011275  | -3.575870 | 2.536345  |
| O | -1.440895 | -0.852838 | -4.945258 |
| O | 3.752930  | 0.572474  | -3.610412 |
| O | 1.789049  | -4.420768 | -2.191975 |
| O | -4.906912 | -1.248862 | -1.413009 |
| O | -3.690041 | -0.276193 | 3.872672  |
| O | -1.688415 | -4.800074 | 1.355809  |
| O | -3.125721 | 3.248866  | -2.701608 |
| O | -1.860170 | 4.246390  | 2.587440  |
| O | 2.052463  | 4.651697  | -1.322237 |
| O | -2.379468 | 1.495311  | 2.020643  |
| O | 0.070550  | 2.218050  | 2.685005  |
| O | -0.944916 | -0.182757 | 3.486230  |
| O | -3.084416 | 0.911484  | -1.082811 |
| O | -1.248623 | 1.119509  | -2.914415 |

|    |           |           |           |
|----|-----------|-----------|-----------|
| O  | -2.168859 | -1.223934 | -2.231253 |
| O  | 1.755529  | 1.935059  | -2.116327 |
| O  | 2.405911  | 2.401267  | 0.363078  |
| O  | 3.278094  | 0.266224  | -0.829686 |
| O  | -0.303934 | -3.308202 | -0.630031 |
| O  | 0.324146  | -2.863680 | 1.851203  |
| O  | 2.133541  | -2.643168 | -0.006373 |
| Si | -0.005115 | 0.005841  | 0.047384  |
| Ru | 0.970435  | 0.527174  | 3.206692  |
| O  | 1.105349  | 1.018959  | 5.078485  |
| O  | 2.378970  | 1.641600  | 5.396714  |
| H  | 2.812264  | 1.646733  | 4.505909  |

**TS2 (Multiplicity = 3)**

55

|   |           |           |           |
|---|-----------|-----------|-----------|
| O | 0.933068  | -0.009849 | 1.441954  |
| O | 0.952373  | -0.472985 | -1.200702 |
| O | -1.276839 | -0.994729 | 0.234271  |
| O | -0.530391 | 1.539226  | -0.199453 |
| W | 2.951298  | 1.186752  | 1.672683  |
| W | 1.888130  | -1.988086 | 2.417746  |
| W | 0.139361  | -0.691101 | -3.447641 |
| W | 2.921488  | 0.615280  | -2.002542 |
| W | 1.998618  | -2.587425 | -1.288424 |
| W | -1.847756 | 2.167169  | -2.102578 |
| W | -1.973728 | 2.737063  | 1.304634  |
| W | 0.866951  | 3.395074  | -0.490814 |
| W | -2.956829 | -1.360913 | -1.482205 |
| W | -3.000694 | -0.751426 | 1.918316  |
| W | -1.122217 | -3.311815 | 0.608538  |
| O | 3.249748  | -0.563621 | 2.370866  |
| O | 1.062869  | -1.168305 | 3.837904  |
| O | 1.829777  | 1.502943  | 3.413360  |
| O | 3.326551  | -1.250953 | -1.817444 |
| O | 1.906550  | 0.261569  | -3.530398 |
| O | 1.179650  | -2.249435 | -3.039741 |
| O | -2.472759 | -2.639663 | 1.784910  |
| O | -2.372515 | -3.089928 | -0.848140 |
| O | -3.876509 | -1.094667 | 0.109382  |
| O | -0.514318 | 3.937986  | 0.681684  |
| O | -0.383715 | 3.438502  | -1.950867 |
| O | -2.643931 | 2.943077  | -0.596304 |
| O | 4.347516  | 2.013193  | 2.272911  |
| O | 2.769081  | -3.249788 | 3.208973  |



|    |           |           |           |
|----|-----------|-----------|-----------|
| O  | -0.110356 | -0.895195 | -5.147348 |
| O  | 4.387257  | 1.208006  | -2.703420 |
| O  | 2.874963  | -4.030937 | -1.665620 |
| O  | -4.233879 | -1.823719 | -2.551946 |
| O  | -4.445501 | -0.897105 | 2.864111  |
| O  | -1.295092 | -5.010162 | 0.881287  |
| O  | -2.754256 | 2.896979  | -3.381621 |
| O  | -3.029094 | 3.906670  | 2.027167  |
| O  | 1.678280  | 4.903164  | -0.731190 |
| O  | -2.992401 | 1.108094  | 1.378737  |
| O  | -0.958436 | 2.185584  | 2.700140  |
| O  | -1.738995 | -0.404127 | 3.165645  |
| O  | -2.818327 | 0.525442  | -1.807162 |
| O  | -0.628276 | 1.019240  | -3.104575 |
| O  | -1.402161 | -1.452386 | -2.712504 |
| O  | 1.975280  | 2.207221  | -1.597399 |
| O  | 1.895467  | 2.625681  | 0.961021  |
| O  | 3.435925  | 0.737348  | -0.039973 |
| O  | 0.311503  | -3.271466 | -0.698313 |
| O  | 0.262733  | -2.867758 | 1.872769  |
| O  | 2.414781  | -2.312005 | 0.520891  |
| Si | 0.011527  | 0.010707  | 0.063180  |
| Ru | 0.064277  | 0.549076  | 3.381319  |
| O  | -0.301682 | 1.072864  | 5.303441  |
| O  | 0.629330  | 1.882147  | 5.805574  |
| H  | 1.882222  | 1.979127  | 4.263513  |

**4<sub>ox</sub>-H<sub>2</sub>O**(Multiplicity = 3)

58

|   |           |           |           |
|---|-----------|-----------|-----------|
| O | 0.769628  | -0.884278 | 1.192752  |
| O | -0.927800 | -1.008634 | -0.880804 |
| O | -0.977500 | 1.112775  | 0.777349  |
| O | 1.093870  | 0.771368  | -0.898165 |
| W | 2.259076  | -2.712526 | 0.707166  |
| W | -0.309397 | -2.172537 | 2.907523  |
| W | -2.332903 | -0.270538 | -2.668944 |
| W | -0.064744 | -2.770967 | -2.223465 |
| W | -2.639002 | -2.405212 | -0.024438 |
| W | 0.513770  | 2.147516  | -2.770913 |
| W | 2.644263  | 2.408911  | -0.093496 |
| W | 2.761577  | -0.333709 | -2.161909 |
| W | -2.336911 | 2.695261  | -0.403336 |
| W | -0.183830 | 2.807499  | 2.266073  |
| W | -2.768105 | 0.570901  | 2.219412  |

|    |           |           |           |
|----|-----------|-----------|-----------|
| O  | 1.068186  | -3.310084 | 2.064289  |
| O  | 1.040129  | -1.242747 | 3.768788  |
| O  | 3.168541  | -1.597869 | 1.973086  |
| O  | -1.594872 | -3.473277 | -1.228176 |
| O  | -1.318796 | -1.823166 | -3.307693 |
| O  | -3.350305 | -1.502316 | -1.612689 |
| O  | -1.768759 | 2.006375  | 3.045832  |
| O  | -3.442439 | 1.866597  | 0.970260  |
| O  | -1.446352 | 3.645809  | 0.952491  |
| O  | 3.607367  | 1.132805  | -1.289451 |
| O  | 1.893974  | 0.951574  | -3.351324 |
| O  | 1.820242  | 3.086641  | -1.752086 |
| O  | 3.378009  | -4.026611 | 0.614907  |
| O  | -0.858913 | -3.221877 | 4.167538  |
| O  | -3.391312 | -0.044746 | -4.017624 |
| O  | 0.274173  | -4.127770 | -3.240395 |
| O  | -3.950323 | -3.485021 | 0.300702  |
| O  | -3.431875 | 3.896213  | -0.992971 |
| O  | 0.018104  | 4.175970  | 3.307017  |
| O  | -4.105977 | 0.473240  | 3.309426  |
| O  | 0.375805  | 3.178760  | -4.151496 |
| O  | 3.873436  | 3.616201  | 0.082645  |
| O  | 4.040294  | -0.862367 | -3.197254 |
| O  | 1.181369  | 3.111274  | 0.896482  |
| O  | 3.026287  | 1.253132  | 1.302693  |
| O  | 0.925668  | 1.558220  | 3.005959  |
| O  | -0.857611 | 2.870614  | -1.595141 |
| O  | -0.807934 | 0.800087  | -3.156242 |
| O  | -2.813688 | 1.161351  | -1.530139 |
| O  | 1.322901  | -1.562864 | -2.676084 |
| O  | 2.967383  | -1.474579 | -0.661444 |
| O  | 0.998724  | -3.171702 | -0.655321 |
| O  | -3.161285 | -0.827317 | 0.977400  |
| O  | -1.537421 | -0.705850 | 3.011236  |
| O  | -1.457327 | -2.751658 | 1.401306  |
| Si | -0.017260 | 0.005956  | 0.036020  |
| Ru | 2.137459  | -0.010491 | 2.588106  |
| O  | 3.350411  | 0.455068  | 4.020158  |
| O  | 4.731613  | 0.682401  | 3.722260  |
| H  | 4.857753  | 0.447323  | 2.764040  |
| O  | 5.446186  | -0.296335 | 1.216326  |
| H  | 4.750515  | -0.969349 | 1.401403  |
| H  | 4.969952  | 0.276680  | 0.590503  |

TS2' (Multiplicity = 3)

58

|   |           |           |           |
|---|-----------|-----------|-----------|
| O | 0.972285  | -0.762359 | 1.137318  |
| O | -0.957892 | -1.123051 | -0.694149 |
| O | -0.933057 | 1.113681  | 0.810387  |
| O | 0.929710  | 0.751799  | -1.087203 |
| W | 2.479471  | -2.540195 | 0.567656  |
| W | 0.197241  | -1.955653 | 3.061420  |
| W | -2.627689 | -0.589381 | -2.326535 |
| W | -0.177182 | -2.930969 | -2.031016 |
| W | -2.450301 | -2.538908 | 0.472024  |
| W | 0.030940  | 1.956512  | -2.964718 |
| W | 2.459937  | 2.527027  | -0.597902 |
| W | 2.488436  | -0.341724 | -2.474369 |
| W | -2.531796 | 2.530924  | -0.289618 |
| W | -0.070615 | 2.967844  | 2.073648  |
| W | -2.494774 | 0.591546  | 2.504647  |
| O | 1.554650  | -3.074782 | 2.123271  |
| O | 1.577996  | -0.901430 | 3.690395  |
| O | 3.528767  | -1.264454 | 1.648191  |
| O | -1.492764 | -3.641818 | -0.783513 |
| O | -1.603641 | -2.141682 | -2.996520 |
| O | -3.409768 | -1.811179 | -1.070475 |
| O | -1.500416 | 2.133946  | 3.095279  |
| O | -3.404078 | 1.737135  | 1.266574  |
| O | -1.549518 | 3.625021  | 0.867704  |
| O | 3.329155  | 1.237710  | -1.849345 |
| O | 1.386592  | 0.786390  | -3.635764 |
| O | 1.377572  | 3.035719  | -2.184183 |
| O | 3.676718  | -3.777051 | 0.420978  |
| O | -0.124674 | -2.950265 | 4.439571  |
| O | -3.864016 | -0.531713 | -3.534411 |
| O | 0.124020  | -4.338909 | -2.988600 |
| O | -3.633481 | -3.667199 | 1.036614  |
| O | -3.773184 | 3.614451  | -0.813567 |
| O | 0.143167  | 4.432894  | 2.972628  |
| O | -3.678609 | 0.499892  | 3.760590  |
| O | -0.341340 | 2.869954  | -4.384350 |
| O | 3.618237  | 3.813257  | -0.676532 |
| O | 3.658879  | -0.883222 | -3.625774 |
| O | 1.089311  | 3.228501  | 0.518635  |
| O | 3.100422  | 1.504858  | 0.798148  |
| O | 1.196034  | 1.871640  | 2.773902  |
| O | -1.240990 | 2.687751  | -1.678521 |

|    |           |           |           |
|----|-----------|-----------|-----------|
| O  | -1.253439 | 0.513009  | -3.086304 |
| O  | -3.053905 | 0.878700  | -1.230231 |
| O  | 1.080292  | -1.693677 | -2.711889 |
| O  | 2.951061  | -1.343417 | -0.930603 |
| O  | 1.125662  | -3.171769 | -0.579883 |
| O  | -2.943510 | -0.928322 | 1.425022  |
| O  | -1.097711 | -0.562424 | 3.222872  |
| O  | -1.072024 | -2.716340 | 1.746678  |
| Si | -0.004525 | 0.001291  | 0.035718  |
| Ru | 2.419524  | 0.314937  | 2.312588  |
| O  | 3.749981  | 1.046766  | 3.592408  |
| O  | 5.085730  | 1.042196  | 3.322388  |
| H  | 5.291226  | 0.568825  | 2.178780  |
| O  | 5.457636  | 0.051505  | 1.131600  |
| H  | 4.586663  | -0.730179 | 1.308806  |
| H  | 4.968136  | 0.652647  | 0.536352  |

**5([Ru<sup>IV</sup>( $\eta^2$ -OO)SiW<sub>11</sub>O<sub>39</sub>]<sup>6-</sup>) (Multiplicity = 1)**

54

|   |           |           |           |
|---|-----------|-----------|-----------|
| O | -1.159817 | -0.002885 | 1.307967  |
| O | -0.723988 | -0.001129 | -1.390810 |
| O | 0.918156  | 1.349620  | 0.248632  |
| O | 0.923820  | -1.345958 | 0.247913  |
| W | -2.863140 | -1.730521 | 1.476736  |
| W | -2.869786 | 1.717505  | 1.479728  |
| W | 0.534949  | 0.003370  | -3.480702 |
| W | -2.152840 | -1.707466 | -2.224783 |
| W | -2.161770 | 1.698962  | -2.223013 |
| W | 2.807394  | -1.871961 | -1.172876 |
| W | 2.150917  | -1.844281 | 2.214686  |
| W | 0.114624  | -3.564676 | 0.063891  |
| W | 2.799760  | 1.884762  | -1.170957 |
| W | 2.142135  | 1.852699  | 2.215682  |
| W | 0.098670  | 3.564733  | 0.065681  |
| O | -3.767091 | -0.008404 | 1.444076  |
| O | -2.261989 | 1.455537  | 3.173356  |
| O | -2.255483 | -1.468823 | 3.170578  |
| O | -2.966370 | -0.004886 | -2.682705 |
| O | -0.861559 | -1.325630 | -3.632016 |
| O | -0.866938 | 1.326549  | -3.629988 |
| O | 1.264071  | 3.505082  | 1.580035  |
| O | 1.697562  | 3.464347  | -1.046031 |
| O | 3.351870  | 2.147152  | 0.594517  |
| O | 1.279150  | -3.501445 | 1.576836  |

|    |           |           |           |
|----|-----------|-----------|-----------|
| O  | 1.711296  | -3.456026 | -1.049974 |
| O  | 3.360841  | -2.134324 | 0.591675  |
| O  | -4.191315 | -2.817713 | 1.755444  |
| O  | -4.202521 | 2.798845  | 1.759492  |
| O  | 1.142157  | 0.005512  | -5.110047 |
| O  | -3.220163 | -2.781723 | -3.081563 |
| O  | -3.233103 | 2.770373  | -3.078341 |
| O  | 4.156762  | 2.517120  | -2.055356 |
| O  | 3.229044  | 2.533722  | 3.395362  |
| O  | -0.202320 | 5.274666  | -0.013344 |
| O  | 4.166508  | -2.497776 | -2.058695 |
| O  | 3.241680  | -2.522662 | 3.392394  |
| O  | -0.179627 | -5.275668 | -0.017411 |
| O  | 2.712255  | 0.004526  | 2.105189  |
| O  | 0.708233  | -1.398974 | 3.189884  |
| O  | 0.701382  | 1.397093  | 3.189213  |
| O  | 3.232893  | 0.007272  | -1.061621 |
| O  | 1.634201  | -1.296302 | -2.631722 |
| O  | 1.629440  | 1.306656  | -2.630637 |
| O  | -0.877666 | -2.931640 | -1.473925 |
| O  | -1.379657 | -2.956074 | 1.082614  |
| O  | -2.921377 | -1.623150 | -0.514101 |
| O  | -0.890003 | 2.929159  | -1.470700 |
| O  | -1.391858 | 2.949275  | 1.086453  |
| O  | -2.927917 | 1.611965  | -0.511789 |
| Si | -0.011114 | -0.000084 | 0.094251  |
| Ru | -0.806338 | -0.003982 | 3.439090  |
| O  | -0.152703 | -0.001090 | 5.351895  |
| O  | -1.531975 | -0.009062 | 5.309660  |

**5([Ru<sup>IV</sup>( $\eta^1$ -OO)SiW<sub>11</sub>O<sub>39</sub>)<sup>6-</sup>) (Multiplicity = 1)**

54

|   |           |           |           |
|---|-----------|-----------|-----------|
| O | 1.181464  | -0.403379 | 1.180093  |
| O | 0.643775  | -0.089556 | -1.455550 |
| O | -1.242800 | -1.066080 | 0.206335  |
| O | -0.516177 | 1.518459  | 0.357319  |
| W | 3.263217  | 0.772668  | 1.476238  |
| W | 2.336880  | -2.504307 | 1.212026  |
| W | -0.594990 | 0.408189  | -3.452616 |
| W | 2.491866  | 1.209680  | -2.203372 |
| W | 1.542133  | -2.054967 | -2.439124 |
| W | -2.212729 | 2.639349  | -0.931511 |
| W | -1.510734 | 2.183008  | 2.401012  |
| W | 0.873130  | 3.437492  | 0.290550  |

|    |           |           |           |
|----|-----------|-----------|-----------|
| W  | -3.234699 | -0.964214 | -1.167777 |
| W  | -2.544867 | -1.359640 | 2.205994  |
| W  | -1.069879 | -3.385401 | -0.143253 |
| O  | 3.688030  | -1.114195 | 1.250006  |
| O  | 1.869626  | -2.185102 | 2.958471  |
| O  | 2.666495  | 0.531384  | 3.167104  |
| O  | 2.780388  | -0.605748 | -2.817530 |
| O  | 1.098425  | 1.311475  | -3.582373 |
| O  | 0.373234  | -1.243094 | -3.761402 |
| O  | -2.144738 | -3.127356 | 1.416184  |
| O  | -2.601262 | -2.785742 | -1.191134 |
| O  | -3.803173 | -1.192694 | 0.591386  |
| O  | -0.224699 | 3.569449  | 1.860298  |
| O  | -0.731652 | 3.861084  | -0.734563 |
| O  | -2.625954 | 2.906298  | 0.889486  |
| O  | 4.843394  | 1.444748  | 1.754831  |
| O  | 3.315249  | -3.930013 | 1.386148  |
| O  | -1.227608 | 0.690322  | -5.047953 |
| O  | 3.782008  | 2.019555  | -3.043880 |
| O  | 2.256044  | -3.311986 | -3.406725 |
| O  | -4.728352 | -1.136182 | -2.041228 |
| O  | -3.784623 | -1.799976 | 3.349292  |
| O  | -1.242717 | -5.104272 | -0.335052 |
| O  | -3.376632 | 3.681031  | -1.694675 |
| O  | -2.313594 | 3.017712  | 3.700747  |
| O  | 1.618506  | 5.007093  | 0.314694  |
| O  | -2.577993 | 0.572539  | 2.220777  |
| O  | -0.209554 | 1.244762  | 3.260391  |
| O  | -1.053807 | -1.394685 | 3.203104  |
| O  | -3.135883 | 0.952971  | -0.915501 |
| O  | -1.287321 | 1.899295  | -2.475940 |
| O  | -1.981043 | -0.606312 | -2.629043 |
| O  | 1.602304  | 2.681504  | -1.323629 |
| O  | 2.163302  | 2.375838  | 1.213447  |
| O  | 3.247612  | 0.814779  | -0.547979 |
| O  | 0.016381  | -2.941708 | -1.692763 |
| O  | 0.558212  | -3.258774 | 0.839067  |
| O  | 2.364196  | -2.305842 | -0.758319 |
| Si | 0.015868  | -0.014213 | 0.066793  |
| Ru | 0.824059  | -0.486304 | 3.352492  |
| O  | 0.664659  | -0.766794 | 5.179957  |
| O  | 1.627406  | -0.563450 | 6.054968  |

[Ru<sup>IV</sup>( $\eta^1$ -OO)SiW<sub>11</sub>O<sub>39</sub>]<sup>6-</sup> (Multiplicity = 3)

54

|   |           |           |           |
|---|-----------|-----------|-----------|
| O | 1.075193  | 0.306364  | 1.292342  |
| O | 0.868603  | -0.465674 | -1.272952 |
| O | -1.042550 | -1.167933 | 0.495632  |
| O | -0.820562 | 1.389383  | -0.285407 |
| W | 2.811537  | 1.930070  | 1.286102  |
| W | 2.519299  | -1.318289 | 2.271708  |
| W | -0.113146 | -1.019417 | -3.374539 |
| W | 2.540253  | 0.856564  | -2.316974 |
| W | 2.255232  | -2.390709 | -1.330587 |
| W | -2.471856 | 1.562428  | -2.037452 |
| W | -2.250690 | 2.517066  | 1.277753  |
| W | 0.186990  | 3.408161  | -0.974038 |
| W | -2.786444 | -2.012637 | -0.949071 |
| W | -2.563170 | -1.004465 | 2.352307  |
| W | -0.410109 | -3.359508 | 1.083861  |
| O | 3.588506  | 0.256184  | 1.895993  |
| O | 1.723107  | -0.506468 | 3.718590  |
| O | 1.975670  | 2.196436  | 2.891278  |
| O | 3.251273  | -0.945837 | -2.149475 |
| O | 1.395264  | 0.134523  | -3.725171 |
| O | 1.170910  | -2.405201 | -2.948800 |
| O | -1.729774 | -2.787871 | 2.353036  |
| O | -1.853779 | -3.534331 | -0.208543 |
| O | -3.563525 | -1.706567 | 0.726226  |
| O | -1.140578 | 3.847017  | 0.333679  |
| O | -1.270412 | 3.062473  | -2.218165 |
| O | -3.204971 | 2.363446  | -0.512512 |
| O | 4.179716  | 2.994539  | 1.426708  |
| O | 3.699120  | -2.326381 | 3.056097  |
| O | -0.532040 | -1.481192 | -4.998344 |
| O | 3.783916  | 1.575069  | -3.297960 |
| O | 3.317207  | -3.723184 | -1.679236 |
| O | -4.080613 | -2.817287 | -1.785271 |
| O | -3.848695 | -1.267505 | 3.497920  |
| O | -0.249708 | -5.024226 | 1.555945  |
| O | -3.659904 | 1.965739  | -3.240439 |
| O | -3.412588 | 3.579070  | 2.023040  |
| O | 0.631197  | 5.003640  | -1.499371 |
| O | -2.947968 | 0.755779  | 1.644877  |
| O | -1.007102 | 2.301177  | 2.574865  |
| O | -1.241870 | -0.312390 | 3.371644  |
| O | -3.072924 | -0.171828 | -1.446574 |
| O | -1.196525 | 0.525395  | -3.096933 |

|    |           |           |           |
|----|-----------|-----------|-----------|
| O  | -1.412690 | -1.954727 | -2.335191 |
| O  | 1.293480  | 2.302638  | -2.120520 |
| O  | 1.498986  | 3.060172  | 0.365145  |
| O  | 3.105482  | 1.246099  | -0.570323 |
| O  | 0.803816  | -3.264939 | -0.416788 |
| O  | 0.998266  | -2.536110 | 2.078472  |
| O  | 2.829899  | -1.834827 | 0.374255  |
| Si | 0.018235  | 0.013885  | 0.056126  |
| Ru | 0.379171  | 0.963133  | 3.281753  |
| O  | -0.053122 | 1.399994  | 5.215021  |
| O  | 0.644401  | 2.332135  | 5.845456  |

**[Ru<sup>IV</sup>( $\eta^1$ -OO)SiW<sub>11</sub>O<sub>39</sub>]<sup>6-</sup> (Multiplicity = 5)**

54

|   |           |           |           |
|---|-----------|-----------|-----------|
| O | 1.160942  | 0.692917  | 1.090524  |
| O | 0.577436  | -1.349013 | -0.606154 |
| O | -1.375431 | -0.242051 | 0.894559  |
| O | -0.289051 | 1.142502  | -1.129712 |
| W | 3.471640  | 1.278394  | 0.398442  |
| W | 2.005554  | -0.456461 | 2.988915  |
| W | -0.666830 | -2.694256 | -2.190176 |
| W | 2.543208  | -1.534263 | -1.949670 |
| W | 1.167487  | -3.273688 | 0.633285  |
| W | -1.872881 | 0.769349  | -2.920637 |
| W | -1.128802 | 3.352032  | -0.742760 |
| W | 1.339812  | 1.904987  | -2.660413 |
| W | -3.390776 | -1.193755 | -0.104682 |
| W | -2.675831 | 1.438362  | 2.034706  |
| W | -1.532758 | -1.730140 | 2.696221  |
| O | 3.550603  | 0.149938  | 1.970254  |
| O | 1.697610  | 1.261805  | 3.613415  |
| O | 2.998145  | 2.730386  | 1.343002  |
| O | 2.559013  | -3.015817 | -0.683923 |
| O | 1.121979  | -2.525477 | -2.867023 |
| O | 0.051262  | -3.882406 | -0.841862 |
| O | -2.540059 | -0.188856 | 3.174885  |
| O | -3.002022 | -2.192687 | 1.493563  |
| O | -3.934932 | 0.251921  | 0.937647  |
| O | 0.339795  | 3.432897  | -2.038364 |
| O | -0.225720 | 1.417012  | -3.703833 |
| O | -2.174211 | 2.498710  | -2.248697 |
| O | 5.154819  | 1.588232  | 0.083101  |
| O | 2.791488  | -1.155728 | 4.372878  |
| O | -1.317266 | -3.847840 | -3.316909 |



|    |           |           |           |
|----|-----------|-----------|-----------|
| O  | 3.889638  | -1.978731 | -2.957802 |
| O  | 1.659818  | -4.809781 | 1.284381  |
| O  | -4.919366 | -1.884084 | -0.561823 |
| O  | -3.929669 | 2.316293  | 2.866503  |
| O  | -1.923189 | -2.758067 | 4.042099  |
| O  | -2.900259 | 0.766695  | -4.322565 |
| O  | -1.805682 | 4.944297  | -0.935013 |
| O  | 2.276690  | 2.658814  | -3.913901 |
| O  | -2.394310 | 2.475829  | 0.441006  |
| O  | 0.009916  | 3.581081  | 0.659601  |
| O  | -1.175034 | 2.056150  | 2.794109  |
| O  | -3.022433 | 0.007126  | -1.584779 |
| O  | -1.104528 | -1.021269 | -3.005674 |
| O  | -2.152943 | -2.370671 | -1.042110 |
| O  | 1.895024  | 0.057157  | -2.811143 |
| O  | 2.545641  | 1.985969  | -1.190155 |
| O  | 3.316760  | -0.433034 | -0.669467 |
| O  | -0.436638 | -2.917193 | 1.632512  |
| O  | 0.137104  | -0.955323 | 3.262983  |
| O  | 2.001211  | -2.038499 | 1.792220  |
| Si | 0.017568  | 0.051271  | 0.062536  |
| Ru | 0.914726  | 2.560856  | 2.226381  |
| O  | 0.821597  | 4.175836  | 3.494490  |
| O  | 1.851175  | 4.990340  | 3.637758  |

**6([Ru<sup>V</sup>( $\eta^2$ -OO)SiW<sub>11</sub>O<sub>39</sub>]<sup>5-</sup>) (Multiplicity = 2)**

54

|   |           |           |           |
|---|-----------|-----------|-----------|
| W | 0.038340  | 3.562769  | 0.229996  |
| W | 0.108186  | 0.189866  | -3.503271 |
| W | 0.192575  | -3.554016 | -0.098184 |
| W | -2.682897 | 1.590293  | 1.912490  |
| W | -2.357786 | -1.670064 | -2.061278 |
| W | 2.672340  | -1.737443 | -1.558551 |
| W | 2.365830  | 1.795645  | 1.977501  |
| W | 2.588918  | 2.005703  | -1.412980 |
| W | 2.453306  | -1.905002 | 1.882587  |
| W | -2.660662 | -1.844906 | 1.653407  |
| W | -2.458760 | 1.727011  | -1.835806 |
| O | -0.989059 | -0.070447 | 1.419015  |
| O | 0.927031  | 1.360013  | 0.164419  |
| O | -0.891757 | 0.035013  | -1.283183 |
| O | 0.974710  | -1.329639 | 0.093245  |
| O | 2.941126  | -0.039761 | 1.805171  |
| O | -3.005731 | 1.559839  | -0.037662 |

|    |           |           |           |
|----|-----------|-----------|-----------|
| O  | 3.079660  | 0.150105  | -1.414611 |
| O  | -2.964375 | -1.677489 | -0.241104 |
| O  | -1.123148 | 2.955094  | -1.170514 |
| O  | -1.189675 | -3.008260 | 1.100805  |
| O  | 1.287700  | 1.492943  | -2.743199 |
| O  | 1.152536  | -1.522860 | 3.095321  |
| O  | 1.317953  | -1.108587 | -2.830503 |
| O  | 0.941341  | 1.197420  | 2.990570  |
| O  | -1.008351 | -2.879849 | -1.480005 |
| O  | -1.297421 | 2.844455  | 1.431922  |
| O  | -3.555762 | -0.159669 | 1.906895  |
| O  | 3.354344  | 2.199382  | 0.328747  |
| O  | -3.267191 | 0.034211  | -2.284425 |
| O  | 3.436965  | -2.073323 | 0.113685  |
| O  | -1.773364 | -1.605935 | 3.289757  |
| O  | -1.323675 | 1.472303  | -3.399625 |
| O  | 1.515092  | -3.524762 | 1.282536  |
| O  | 1.503331  | 3.562287  | -1.042529 |
| O  | 1.363520  | 3.443104  | 1.605429  |
| O  | 1.626025  | -3.352371 | -1.386122 |
| O  | -1.876926 | 1.175366  | 3.534457  |
| O  | -1.271295 | -1.176639 | -3.567674 |
| O  | 0.323738  | 0.225515  | 5.262972  |
| O  | -0.317482 | 5.253885  | 0.282298  |
| O  | 0.516925  | 0.277114  | -5.180987 |
| O  | -0.082851 | -5.256818 | -0.216157 |
| O  | -3.969590 | 2.614807  | 2.446188  |
| O  | -3.495788 | -2.724404 | -2.826922 |
| O  | 3.917360  | -2.285550 | -2.626580 |
| O  | 3.485810  | 2.412596  | 3.145703  |
| O  | 3.829783  | 2.713875  | -2.387489 |
| O  | 3.693652  | -2.606775 | 2.868547  |
| O  | -3.887469 | -2.972259 | 2.113603  |
| O  | -3.638224 | 2.808677  | -2.493338 |
| O  | -0.551391 | -0.801829 | 5.340488  |
| Ru | -0.388520 | -0.197539 | 3.432409  |
| Si | 0.016817  | -0.001700 | 0.081678  |

**6([Ru<sup>V</sup>( $\eta^1$ -OO)SiW<sub>11</sub>O<sub>39</sub>]<sup>5-</sup>) (Multiplicity = 2)**

54

|   |           |           |           |
|---|-----------|-----------|-----------|
| O | 1.001642  | -0.214342 | 1.351971  |
| O | 0.771295  | -0.501571 | -1.305064 |
| O | -1.377561 | -0.866653 | 0.284427  |
| O | -0.368428 | 1.596858  | -0.074617 |

|   |           |           |           |
|---|-----------|-----------|-----------|
| W | 3.164527  | 0.792959  | 1.648276  |
| W | 1.865011  | -2.350025 | 2.016377  |
| W | -0.179753 | -0.390628 | -3.492340 |
| W | 2.827922  | 0.405809  | -2.076091 |
| W | 1.526253  | -2.717583 | -1.691104 |
| W | -1.750505 | 2.521779  | -1.787123 |
| W | -1.500067 | 2.836887  | 1.601175  |
| W | 1.252382  | 3.310395  | -0.374043 |
| W | -3.179250 | -0.904177 | -1.304543 |
| W | -2.904743 | -0.565030 | 2.114581  |
| W | -1.454656 | -3.209401 | 0.500455  |
| O | 3.346248  | -1.114677 | 1.994105  |
| O | 1.208724  | -1.503211 | 3.586339  |
| O | 2.311943  | 1.020152  | 3.267826  |
| O | 2.960188  | -1.528102 | -2.196898 |
| O | 1.615868  | 0.293972  | -3.601483 |
| O | 0.608020  | -2.154155 | -3.289795 |
| O | -2.633822 | -2.482447 | 1.826468  |
| O | -2.787111 | -2.732081 | -0.827120 |
| O | -3.943217 | -0.643812 | 0.390551  |
| O | 0.026823  | 3.891563  | 0.989471  |
| O | -0.175711 | 3.625654  | -1.654917 |
| O | -2.325633 | 3.270772  | -0.113924 |
| O | 4.757679  | 1.357695  | 2.015644  |
| O | 2.616269  | -3.747789 | 2.700863  |
| O | -0.606737 | -0.443806 | -5.167538 |
| O | 4.285429  | 0.858668  | -2.890276 |
| O | 2.174291  | -4.229810 | -2.224502 |
| O | -4.587045 | -1.129843 | -2.283193 |
| O | -4.263085 | -0.592570 | 3.189641  |
| O | -1.802739 | -4.893052 | 0.684291  |
| O | -2.698485 | 3.456140  | -2.890673 |
| O | -2.288187 | 4.011093  | 2.597536  |
| O | 2.171905  | 4.755654  | -0.605298 |
| O | -2.675025 | 1.324775  | 1.736482  |
| O | -0.368376 | 1.966020  | 2.833840  |
| O | -1.490407 | -0.478659 | 3.258351  |
| O | -2.873198 | 0.999025  | -1.477196 |
| O | -0.783819 | 1.360718  | -2.983892 |
| O | -1.757680 | -1.028380 | -2.638217 |
| O | 2.051497  | 2.116239  | -1.659630 |
| O | 2.306731  | 2.381821  | 0.921428  |
| O | 3.361947  | 0.337134  | -0.271716 |
| O | -0.152902 | -3.241157 | -0.931615 |

|    |           |           |          |
|----|-----------|-----------|----------|
| O  | 0.063592  | -2.988783 | 1.650229 |
| O  | 2.140765  | -2.638356 | 0.126828 |
| Si | -0.004171 | 0.000944  | 0.051819 |
| Ru | 0.414602  | 0.269913  | 3.369006 |
| O  | 0.038281  | 0.500870  | 5.302412 |
| O  | 0.946154  | 1.030648  | 6.069156 |

**6** ( $[\text{Ru}^{\text{V}}(\eta^1\text{-OO})\text{SiW}_{11}\text{O}_{39}]^{5-}$ ) (Multiplicity = 4)

54

|   |           |           |           |
|---|-----------|-----------|-----------|
| O | -1.078266 | -0.538591 | 1.188452  |
| O | -0.794371 | 0.226165  | -1.362015 |
| O | 0.666444  | 1.399639  | 0.565670  |
| O | 1.180213  | -1.142243 | -0.137479 |
| W | -2.361306 | -2.559882 | 0.990843  |
| W | -3.042061 | 0.670432  | 1.916291  |
| W | 0.267978  | 0.995106  | -3.362926 |
| W | -1.948490 | -1.463351 | -2.563784 |
| W | -2.588274 | 1.754353  | -1.650551 |
| W | 3.015581  | -0.893234 | -1.657694 |
| W | 2.639142  | -1.900035 | 1.613310  |
| W | 0.795424  | -3.348170 | -0.878256 |
| W | 2.274937  | 2.646292  | -0.688922 |
| W | 1.947766  | 1.625420  | 2.556549  |
| W | -0.577616 | 3.364065  | 1.032728  |
| O | -3.584544 | -1.140793 | 1.497728  |
| O | -2.223305 | 0.077537  | 3.473495  |
| O | -1.645165 | -2.533505 | 2.735314  |
| O | -3.092444 | 0.087249  | -2.517591 |
| O | -0.854804 | -0.502876 | -3.843489 |
| O | -1.358248 | 2.014646  | -3.129463 |
| O | 0.675888  | 3.114547  | 2.463570  |
| O | 0.937101  | 3.886281  | -0.074537 |
| O | 2.909854  | 2.538933  | 1.115875  |
| O | 2.019624  | -3.450435 | 0.598476  |
| O | 2.256028  | -2.652112 | -1.938256 |
| O | 3.730811  | -1.491857 | -0.027913 |
| O | -3.400310 | -3.937436 | 1.077569  |
| O | -4.509335 | 1.340858  | 2.538982  |
| O | 0.753197  | 1.534819  | -4.932696 |
| O | -2.844691 | -2.481332 | -3.636930 |
| O | -3.894278 | 2.765738  | -2.163910 |
| O | 3.430239  | 3.738437  | -1.368462 |
| O | 2.908948  | 2.140230  | 3.900443  |
| O | -1.196737 | 4.928604  | 1.429676  |

|    |           |           |           |
|----|-----------|-----------|-----------|
| O  | 4.400191  | -0.982344 | -2.689974 |
| O  | 3.905257  | -2.617126 | 2.553760  |
| O  | 0.807956  | -4.998697 | -1.392097 |
| O  | 2.801166  | -0.006374 | 2.025362  |
| O  | 1.206815  | -1.981103 | 2.734272  |
| O  | 0.626580  | 0.584944  | 3.396392  |
| O  | 3.080961  | 0.933868  | -1.049311 |
| O  | 1.659744  | -0.211792 | -2.892315 |
| O  | 1.160618  | 2.249344  | -2.209219 |
| O  | -0.424528 | -2.556431 | -2.146754 |
| O  | -0.708473 | -3.320903 | 0.323756  |
| O  | -2.609473 | -1.994752 | -0.853871 |
| O  | -1.528113 | 2.962389  | -0.603892 |
| O  | -1.848001 | 2.215213  | 1.870989  |
| O  | -3.220067 | 1.067060  | -0.001967 |
| Si | 0.009102  | -0.011002 | 0.047834  |
| Ru | -0.522406 | -0.982368 | 3.183395  |
| O  | -0.368766 | -1.553028 | 5.114194  |
| O  | -0.989922 | -2.532210 | 5.680598  |

**6 ([Ru<sup>V</sup>(η<sup>1</sup>-OO)SiW<sub>11</sub>O<sub>39</sub>]<sup>5-</sup>) (Multiplicity = 6)**

54

|   |           |           |           |
|---|-----------|-----------|-----------|
| O | 1.522354  | -0.138312 | 0.675757  |
| O | -0.432625 | -1.519159 | -0.438552 |
| O | -1.035691 | 0.608330  | 1.115000  |
| O | 0.074741  | 0.989836  | -1.290885 |
| W | 3.538680  | -0.744349 | -0.348747 |
| W | 2.073514  | -1.257780 | 2.660311  |
| W | -2.451765 | -2.070194 | -1.492239 |
| W | 0.843115  | -2.830445 | -1.949256 |
| W | -0.627782 | -3.326355 | 1.085124  |
| W | -1.813054 | 1.397075  | -2.714316 |
| W | 0.602500  | 3.326656  | -1.241653 |
| W | 1.474321  | 0.623679  | -3.161244 |
| W | -3.386743 | 0.875799  | 0.629583  |
| W | -0.952710 | 2.816908  | 2.109602  |
| W | -1.532418 | -0.387041 | 3.183155  |
| O | 3.454724  | -1.648194 | 1.377587  |
| O | 2.749410  | 0.485328  | 2.924892  |
| O | 3.978790  | 0.845759  | 0.457871  |
| O | 0.380162  | -3.957533 | -0.438582 |
| O | -1.053314 | -2.956924 | -2.454930 |
| O | -2.193158 | -3.345406 | -0.064586 |
| O | -1.364399 | 1.514616  | 3.490987  |

|    |           |           |           |
|----|-----------|-----------|-----------|
| O  | -3.239283 | 0.000164  | 2.336848  |
| O  | -2.792382 | 2.478498  | 1.452296  |
| O  | 1.592752  | 2.497429  | -2.692638 |
| O  | -0.304288 | 1.012636  | -3.845795 |
| O  | -0.986446 | 3.098048  | -2.337058 |
| O  | 5.080435  | -1.294657 | -0.913506 |
| O  | 2.711633  | -2.067953 | 4.049169  |
| O  | -3.847575 | -2.749993 | -2.256986 |
| O  | 1.493520  | -4.015493 | -3.029012 |
| O  | -0.869777 | -4.813720 | 1.934066  |
| O  | -5.092443 | 1.152356  | 0.562539  |
| O  | -1.273074 | 4.300330  | 2.943009  |
| O  | -2.086828 | -0.884309 | 4.744503  |
| O  | -2.980224 | 1.874734  | -3.897435 |
| O  | 0.915390  | 4.997402  | -1.560465 |
| O  | 2.352049  | 0.626043  | -4.651135 |
| O  | -0.533178 | 3.398502  | 0.311042  |
| O  | 2.024336  | 2.913186  | -0.051076 |
| O  | 0.869149  | 2.619262  | 2.404090  |
| O  | -2.804413 | 1.555183  | -1.081319 |
| O  | -2.150844 | -0.486256 | -2.559585 |
| O  | -3.234250 | -0.854442 | -0.224029 |
| O  | 0.940518  | -1.218009 | -3.002026 |
| O  | 2.842705  | 0.193229  | -1.910722 |
| O  | 2.368945  | -2.209878 | -1.052532 |
| O  | -1.523062 | -2.061569 | 2.219827  |
| O  | 0.346117  | -0.629270 | 3.333361  |
| O  | 0.983777  | -2.674114 | 1.871761  |
| Si | 0.020809  | -0.005344 | 0.016154  |
| Ru | 2.454763  | 1.817812  | 1.487204  |
| O  | 4.498583  | 3.422921  | 2.497449  |
| O  | 5.728721  | 3.531221  | 2.309956  |

**TS3 (Multiplicity = 4)**

57

|   |           |           |           |
|---|-----------|-----------|-----------|
| O | 1.591225  | -0.410330 | 0.289549  |
| O | -0.850493 | -1.363261 | -0.234141 |
| O | -0.566389 | 0.825136  | 1.312290  |
| O | -0.060311 | 0.970933  | -1.322497 |
| W | 3.000343  | -1.629134 | -1.256570 |
| W | 2.343351  | -1.820140 | 2.115399  |
| W | -3.214078 | -1.394007 | -0.700593 |
| W | -0.445222 | -2.924923 | -1.981929 |
| W | -1.101681 | -3.104807 | 1.361425  |

|    |           |           |           |
|----|-----------|-----------|-----------|
| W  | -2.118115 | 1.840956  | -2.214525 |
| W  | 0.997355  | 3.111942  | -1.529944 |
| W  | 0.655231  | 0.303995  | -3.471671 |
| W  | -2.832608 | 1.632460  | 1.457479  |
| W  | 0.283145  | 2.910111  | 2.121028  |
| W  | -0.693026 | -0.079263 | 3.490884  |
| O  | 3.152949  | -2.480558 | 0.481562  |
| O  | 3.454905  | -0.338960 | 2.093123  |
| O  | 3.992351  | -0.185177 | -0.656305 |
| O  | -0.719150 | -3.930876 | -0.350256 |
| O  | -2.360095 | -2.580157 | -1.953808 |
| O  | -2.869984 | -2.723866 | 0.653701  |
| O  | -0.017526 | 1.714067  | 3.641486  |
| O  | -2.429641 | 0.717866  | 3.099055  |
| O  | -1.683067 | 3.040654  | 2.020553  |
| O  | 1.306257  | 2.088563  | -3.167306 |
| O  | -1.114571 | 1.091111  | -3.675824 |
| O  | -0.869330 | 3.272097  | -2.159006 |
| O  | 4.171342  | -2.503379 | -2.181400 |
| O  | 3.102378  | -2.813472 | 3.310831  |
| O  | -4.879407 | -1.711495 | -1.041604 |
| O  | -0.395267 | -4.212113 | -3.136324 |
| O  | -1.457257 | -4.507239 | 2.309644  |
| O  | -4.380728 | 2.304882  | 1.832625  |
| O  | 0.601346  | 4.399768  | 2.946361  |
| O  | -0.922448 | -0.458634 | 5.162083  |
| O  | -3.427114 | 2.581338  | -3.067842 |
| O  | 1.566085  | 4.674923  | -2.014417 |
| O  | 1.078468  | 0.109545  | -5.136615 |
| O  | 0.328191  | 3.425366  | 0.258284  |
| O  | 2.520850  | 2.382590  | -0.766276 |
| O  | 1.996414  | 2.228295  | 1.910446  |
| O  | -2.583713 | 2.179506  | -0.375720 |
| O  | -2.829259 | 0.071753  | -1.868823 |
| O  | -3.322035 | -0.071484 | 0.682329  |
| O  | -0.230406 | -1.373038 | -3.089740 |
| O  | 2.160033  | -0.473805 | -2.593670 |
| O  | 1.384601  | -2.707635 | -1.535396 |
| O  | -1.343734 | -1.684030 | 2.625644  |
| O  | 1.041986  | -0.795061 | 3.164891  |
| O  | 0.760544  | -2.877960 | 1.653754  |
| Si | -0.002201 | 0.017602  | 0.005911  |
| Ru | 3.016153  | 1.012177  | 0.649400  |
| O  | 5.759976  | 1.282845  | 1.271122  |

|   |          |          |          |
|---|----------|----------|----------|
| O | 6.635305 | 1.229835 | 0.409161 |
| O | 4.140688 | 3.782606 | 1.024685 |
| H | 3.418207 | 3.536853 | 1.634799 |
| H | 3.702847 | 3.619675 | 0.166384 |

**3<sub>a</sub>(Ge)** (Multiplicity = 2)

56

|   |           |           |           |
|---|-----------|-----------|-----------|
| O | 0.526863  | 1.165239  | -1.289538 |
| O | -0.651298 | 0.847608  | 1.320815  |
| O | -1.234957 | -1.026935 | -0.735214 |
| O | 1.382175  | -0.958033 | 0.410043  |
| W | 2.098076  | 2.804285  | -0.803168 |
| W | -0.951027 | 2.677511  | -2.298544 |
| W | -1.502000 | -0.285103 | 3.178708  |
| W | 0.598402  | 2.316396  | 2.607847  |
| W | -2.467727 | 2.279755  | 1.147982  |
| W | 1.198828  | -2.655727 | 2.024662  |
| W | 2.585014  | -2.266816 | -1.093108 |
| W | 3.257592  | -0.032017 | 1.398822  |
| W | -2.229367 | -2.752804 | 0.476193  |
| W | -0.828903 | -2.333031 | -2.586229 |
| W | -3.253637 | -0.203252 | -1.533617 |
| O | 0.599034  | 3.679483  | -1.625891 |
| O | 0.052997  | 1.990654  | -3.689619 |
| O | 2.592685  | 2.001918  | -2.454571 |
| O | -1.126752 | 3.154829  | 2.223264  |
| O | -0.347756 | 1.149540  | 3.819131  |
| O | -2.765127 | 1.079780  | 2.670803  |
| O | -2.537446 | -1.444303 | -2.846490 |
| O | -3.629168 | -1.757664 | -0.432271 |
| O | -1.715455 | -3.447121 | -1.261710 |
| O | 3.840489  | -1.299310 | 0.089666  |
| O | 2.693031  | -1.545467 | 2.504865  |
| O | 2.174472  | -3.345588 | 0.576239  |
| O | 3.246478  | 4.095825  | -0.763529 |
| O | -1.811875 | 3.936826  | -3.113982 |
| O | -2.175232 | -0.808172 | 4.683642  |
| O | 1.243807  | 3.469644  | 3.724118  |
| O | -3.795692 | 3.367763  | 1.364682  |
| O | -3.146994 | -4.089485 | 1.077693  |
| O | -0.847236 | -3.396081 | -3.951843 |
| O | -4.822206 | 0.079068  | -2.205212 |
| O | 1.355890  | -3.930140 | 3.183326  |
| O | 3.664513  | -3.416368 | -1.809698 |



|    |           |           |           |
|----|-----------|-----------|-----------|
| O  | 4.762459  | 0.345068  | 2.160291  |
| O  | 0.861177  | -2.807083 | -1.727268 |
| O  | 2.628525  | -0.884181 | -2.304168 |
| O  | 0.069308  | -0.817980 | -3.259786 |
| O  | -0.474564 | -3.121090 | 1.133074  |
| O  | 0.032726  | -1.397185 | 2.979836  |
| O  | -2.342517 | -1.491854 | 1.926252  |
| O  | 2.005498  | 1.043615  | 2.456098  |
| O  | 3.073880  | 1.357589  | 0.112780  |
| O  | 1.227101  | 2.983146  | 0.911624  |
| O  | -3.263679 | 0.890818  | 0.032627  |
| O  | -2.212245 | 1.209092  | -2.333545 |
| O  | -1.667173 | 2.885399  | -0.444660 |
| Ru | 1.441993  | 0.550238  | -3.214592 |
| O  | 2.157877  | 0.443976  | -4.779492 |
| O  | 5.112956  | 0.742801  | -2.997837 |
| H  | 4.406920  | 1.394709  | -2.825345 |
| H  | 4.643827  | -0.059178 | -2.713426 |
| Ge | 0.006889  | 0.010258  | -0.066941 |

**TS1<sub>a</sub>(Ge)** (Multiplicity = 2)

56

|   |           |           |           |
|---|-----------|-----------|-----------|
| O | 0.681163  | 1.226131  | 1.158489  |
| O | 0.939581  | -0.039866 | -1.415293 |
| O | 0.067257  | -1.526714 | 0.870871  |
| O | -1.662264 | 0.412670  | -0.319957 |
| W | 0.868502  | 3.497674  | 0.557591  |
| W | 2.872712  | 1.142947  | 1.993109  |
| W | 0.517398  | -1.542355 | -3.158863 |
| W | 1.126345  | 1.793518  | -2.818469 |
| W | 3.232821  | -0.477609 | -1.413544 |
| W | -2.922721 | -0.901200 | -1.842451 |
| W | -3.404946 | 0.466465  | 1.225955  |
| W | -2.234550 | 2.409112  | -1.330635 |
| W | -0.756960 | -3.468186 | -0.161669 |
| W | -0.980854 | -1.944230 | 2.908477  |
| W | 2.061212  | -2.510262 | 1.492429  |
| O | 2.580111  | 2.927249  | 1.200861  |
| O | 1.848130  | 1.563365  | 3.441997  |
| O | 0.110844  | 3.520749  | 2.241904  |
| O | 2.917197  | 1.014847  | -2.577987 |
| O | 0.739185  | 0.227000  | -3.914837 |
| O | 2.380772  | -1.598930 | -2.821175 |
| O | 0.778620  | -2.716971 | 2.963725  |

|    |           |           |           |
|----|-----------|-----------|-----------|
| O  | 1.003902  | -3.847695 | 0.549849  |
| O  | -1.454446 | -3.403855 | 1.582257  |
| O  | -3.468287 | 2.093405  | 0.128412  |
| O  | -3.172257 | 0.941450  | -2.275284 |
| O  | -4.054653 | -0.522875 | -0.228386 |
| O  | 1.131878  | 5.189182  | 0.294908  |
| O  | 4.471445  | 1.327174  | 2.635270  |
| O  | 0.411669  | -2.503724 | -4.596262 |
| O  | 1.482540  | 2.947810  | -4.060771 |
| O  | 4.894513  | -0.819413 | -1.766055 |
| O  | -1.231482 | -5.055493 | -0.666783 |
| O  | -1.729434 | -2.676794 | 4.291057  |
| O  | 3.335566  | -3.510756 | 2.103561  |
| O  | -4.132601 | -1.652414 | -2.827400 |
| O  | -4.856874 | 0.663043  | 2.148234  |
| O  | -3.008921 | 3.762478  | -2.085088 |
| O  | -2.514228 | -0.954113 | 2.034818  |
| O  | -2.187612 | 1.648919  | 2.414376  |
| O  | -0.463128 | -0.328065 | 3.535928  |
| O  | -2.211230 | -2.380514 | -0.829352 |
| O  | -1.384673 | -1.035455 | -2.903486 |
| O  | 0.152150  | -2.790466 | -1.774376 |
| O  | -0.756279 | 2.054185  | -2.540996 |
| O  | -0.956418 | 3.228652  | -0.218743 |
| O  | 1.368024  | 2.780755  | -1.225586 |
| O  | 2.767650  | -1.920909 | -0.177933 |
| O  | 2.552095  | -0.772485 | 2.155880  |
| O  | 3.324679  | 0.604485  | 0.098825  |
| Ru | -0.205135 | 1.648198  | 3.093201  |
| O  | -0.742868 | 2.369313  | 4.653736  |
| O  | -1.886551 | 3.752409  | 4.228653  |
| H  | -1.216451 | 4.087980  | 3.595511  |
| H  | -2.503689 | 2.526705  | 2.706813  |
| Ge | 0.005782  | 0.025247  | 0.065348  |

**4H<sub>a</sub>(Ge) (Multiplicity = 2)**

56

|   |           |           |           |
|---|-----------|-----------|-----------|
| O | 1.451894  | -0.435480 | -0.955917 |
| O | 0.351063  | -0.044261 | 1.636795  |
| O | -0.450563 | 1.586304  | -0.544172 |
| O | -1.280699 | -1.110578 | -0.400972 |
| W | 2.570412  | -2.492560 | -0.715569 |
| W | 3.476455  | 0.793073  | -0.825663 |
| W | -1.215868 | 0.506040  | 3.296887  |

|    |           |           |           |
|----|-----------|-----------|-----------|
| W  | 1.037744  | -1.983766 | 2.722016  |
| W  | 2.020421  | 1.260676  | 2.627139  |
| W  | -3.382829 | -0.990069 | 0.659403  |
| W  | -2.254655 | -1.376210 | -2.512195 |
| W  | -1.060791 | -3.391137 | -0.015155 |
| W  | -2.376439 | 2.609994  | 0.362113  |
| W  | -0.950807 | 2.200957  | -2.752368 |
| W  | 0.873865  | 3.445350  | -0.167683 |
| O  | 3.882009  | -1.112554 | -0.513280 |
| O  | 3.229722  | 0.504814  | -2.607596 |
| O  | 2.466752  | -2.298023 | -2.546644 |
| O  | 2.177455  | -0.528447 | 3.336864  |
| O  | -0.380192 | -1.163693 | 3.788861  |
| O  | 0.384337  | 1.413290  | 3.743849  |
| O  | 0.127935  | 3.591137  | -1.961499 |
| O  | -0.912547 | 3.861434  | 0.489853  |
| O  | -2.444227 | 2.821243  | -1.489151 |
| O  | -1.806210 | -3.153633 | -1.793879 |
| O  | -2.813504 | -2.823269 | 0.663299  |
| O  | -3.683874 | -1.258818 | -1.322666 |
| O  | 3.533129  | -3.925238 | -0.599146 |
| O  | 5.064695  | 1.476327  | -0.802540 |
| O  | -2.173182 | 0.829688  | 4.701288  |
| O  | 1.542442  | -3.231777 | 3.809460  |
| O  | 3.125857  | 2.105785  | 3.655844  |
| O  | -3.682555 | 3.617356  | 0.883037  |
| O  | -1.567870 | 2.997904  | -4.163206 |
| O  | 1.605341  | 5.007648  | -0.051871 |
| O  | -5.027572 | -1.152066 | 1.170322  |
| O  | -3.063910 | -1.838960 | -3.969621 |
| O  | -1.227509 | -5.105953 | 0.144184  |
| O  | -1.964862 | 0.442375  | -2.741517 |
| O  | -0.262299 | -1.617274 | -3.122936 |
| O  | 0.428323  | 1.254383  | -3.390962 |
| O  | -3.244446 | 0.874551  | 0.236373  |
| O  | -2.488845 | -0.621589 | 2.252794  |
| O  | -1.742900 | 1.860121  | 2.082548  |
| O  | -0.332608 | -2.886983 | 1.686473  |
| O  | 0.706078  | -3.209506 | -0.707051 |
| O  | 2.140430  | -2.238198 | 1.223730  |
| O  | 1.274833  | 2.689975  | 1.551969  |
| O  | 2.319831  | 2.365073  | -0.815186 |
| O  | 3.060913  | 0.831064  | 1.142360  |
| Ru | 1.508817  | -0.488857 | -3.101814 |

|    |          |           |           |
|----|----------|-----------|-----------|
| O  | 1.846605 | -0.671365 | -4.987846 |
| O  | 2.775331 | -1.783345 | -5.277086 |
| H  | 2.862270 | -2.179464 | -4.380378 |
| H  | 0.025393 | -2.488270 | -2.800455 |
| Ge | 0.018501 | -0.008499 | -0.064412 |

**The complete reference 37.**

M. J. Frisch, G. W. Trucks, H. B. Schlegel, G. E. Scuseria, M. A. Robb, J. R. Cheeseman, G. Scalmani, V. Barone, B. Mennucci, G. A. Petersson, H. Nakatsuji, M. Caricato, X. Li, H. P. Hratchian, A. F. Izmaylov, J. Bloino, G. Zheng, J. L. Sonnenberg, M. Hada, M. Ehara, K. Toyota, R. Fukuda, J. Hasegawa, M. Ishida, T. Nakajima, Y. Honda, O. Kitao, H. Nakai, T. Vreven, J. A. Montgomery, Jr., J. E. Peralta, F. Ogliaro, M. Bearpark, J. J. Heyd, E. Brothers, K. N. Kudin, V. N. Staroverov, R. Kobayashi, J. Normand, K. Raghavachari, A. Rendell, J. C. Burant, S. S. Iyengar, J. Tomasi, M. Cossi, N. Rega, J. M. Millam, M. Klene, J. E. Knox, J. B. Cross, V. Bakken, C. Adamo, J. Jaramillo, R. Gomperts, R. E. Stratmann, O. Yazyev, A. J. Austin, R. Cammi, C. Pomelli, J. W. Ochterski, R. L. Martin, K. Morokuma, V. G. Zakrzewski, G. A. Voth, P. Salvador, J. J. Dannenberg, S. Dapprich, A. D. Daniels, O. Farkas, J. B. Foresman, J. V. Ortiz, J. Cioslowski and D. J. Fox, *Gaussian09W, Revision A02*; Gaussian, Inc.: Wallingford, CT, 2009.
